# Sexual selection drives maladaptive learning

## under climate warming

Marie-Jeanne Holveck<sup>1§</sup>, Doriane Muller<sup>1§</sup>, Bertanne Visser<sup>2</sup>, Christophe Pels<sup>1</sup>, Arthur Timmermans<sup>1</sup>, Lidwine Colonval<sup>1</sup>, Fabrice Jan<sup>1</sup>, Michel Crucifix<sup>3</sup> & Caroline M. Nieberding<sup>1\*</sup>

<sup>§</sup>Co-first authors

<sup>1</sup> Evolutionary Ecology and Genetics group, Biodiversity Research Centre, Earth and Life Institute (ELI), UCLouvain, Louvain-la-Neuve, Belgium.

<sup>2</sup> Evolution and Ecophysiology group, Biodiversity Research Centre, Earth and Life Institute (ELI), UCLouvain, Louvain-la-Neuve, Belgium

<sup>3</sup> Earth and Climate, Earth and Life Institute (ELI), UCLouvain, Louvain-la-Neuve, Belgium.

\*Corresponding author: Caroline Nieberding, +32(0)10473488,

caroline.nieberding@uclouvain.be; Evolutionary Ecology and Genetics group, Earth and Life Institute (ELI), UCLouvain, Croix du Sud 4-5, 1348 Louvain-la-Neuve, Belgium

24 ***Abstract***

25 Current predictions for the effects of the climate crisis on biodiversity loss have so far ignored  
26 the effects of learning ability and sexual selection. Using the African butterfly *Bicyclus*  
27 *anymana*, which shows strong phenotypic plasticity in response to temperature, we show that  
28 learning produces a maladaptive mate preference under climate warming. We modelled climate  
29 warming and found that as temperature becomes an unreliable cue at the onset of the dry season,  
30 adult butterflies displayed the wet season rather than the dry season form. Female learning  
31 further suppressed their innate, adaptive sexual preference for dry season males. Instead,  
32 females learned to prefer a phenotype transiently present during the seasonal transition. Female  
33 fertility and longevity were also affected by learning, reducing female fitness following climate  
34 warming. Our results emphasize the importance of sexual selection, learning, and their fitness  
35 consequences for understanding (mal)adaptation of natural populations to climate warming.

## 36 **Introduction**

37 The climate crisis is not the worst human-induced rapid environmental change (HIREC  
38 hereafter), but it is the best documented for its negative effects on biodiversity (IPBES, 2019;  
39 IPCC & Press, 2014). Climate warming is expected to lead to a global extinction rate of 15%  
40 by 2100 (Cahill et al., 2013; Urban, 2015). This predicted extinction rate should be taken with  
41 caution, however, because estimation models do not incorporate key biological responses of  
42 species (Urban, 2015). One such biological response is learning ability, where animals can  
43 modify their behaviour in response to changes in the environment (Candolin & Wong, 2012a).  
44 Learning has emerged as a major response of species to HIREC, as was shown both theoretically  
45 (Botero et al., 2015) and empirically (Brown, 2013; Dukas, 2017; Sih et al., 2011, 2016; Snell-  
46 Rood et al., 2018; West-Eberhard, 2005). It is also now acknowledged that most organisms can  
47 modify their behaviours through learning (Morand-Ferron et al., 2016; Verzijden et al., 2012),  
48 including short-lived, non-social, and small-brained animals (Morand-Ferron et al., 2016;  
49 Nieberding & Holveck, 2018). Learned behaviours for species responses to climate change are  
50 important for two reasons: First, learning can significantly change (innately expressed)  
51 behaviours, such as aversive and reversal learning in response to danger or fear (Ozawa &  
52 Johansen, 2018; Rodrigues et al., 2010; Tedjakumala & Giurfa, 2013), or biased learning toward  
53 the easiest cues to learn (Westerman et al., 2012). Learned behavioural responses of organisms  
54 may thus produce widely different predictions about species responses to HIREC compared to  
55 innate behaviours. Second, most documented cases of learning in response to HIREC have  
56 recently shown that learned behaviours are actually maladaptive (Greggor et al., 2019).  
57 Maladaptation occurs whenever a “strategy” in a population becomes prevalent while it  
58 decreases the fitness of individuals (Crespi, 2000; Nesse, 2005). Learning may, therefore,  
59 accentuate the extinction risk of species, rather than alleviate it (as is usually assumed (Thorpe,

60 1963)), leading to so-called evolutionary traps (i.e., adaptive traits become maladaptive;  
61 Robertson et al., 2013; Schlaepfer et al., 2002).

62 While most work on climate warming documents (mal)adaptation under natural  
63 selection, another key biological mechanism to consider for improving the forecasting of  
64 species extinction rates is sexual selection. Over 50% of recorded climate change impacts are  
65 not due to direct effects of increased temperature, but to biotic interactions (Cahill et al., 2013).  
66 Sexual selection is an important biotic force of evolution (West-Eberhard, 2014) that is affected  
67 by climate warming as well (Candolin & Heuschele, 2008; Candolin & Wong, 2012b; Grazer  
68 & Martin, 2012b). Sexual selection is further important to consider, because it can reduce local  
69 adaptation due to the cost of sexual ornaments (handicap hypothesis) and sexual conflict  
70 (Servedio & Boughman, 2017). Sexual selection may thus act against natural selection,  
71 increasing the risk of population extinction (Kokko & Brooks, 2003; Martínez-Ruiz & Knell,  
72 2017; Tanaka, 1996).

73 Sexual interactions are strongly affected by learning (in vertebrates: Verzijden et al.,  
74 2012, and insects: Dion et al., 2019), but whether and how animal responses to the climate crisis  
75 are mitigated by learned sexual behaviours remains virtually unexplored (Barrett et al., 2019;  
76 Greggor et al., 2019). We used an ectothermic insect as a model, the African butterfly *Bicyclus*  
77 *anymana* (Butler 1879; Nymphalidae), which has been studied in-depth for sexual selection (San  
78 Martin et al., 2011), and whose sexual interactions are affected by learning. Indeed, exposure  
79 of females to males with modified artificial wing ornamentation influenced mate preferences  
80 (Westerman et al., 2012). Many insects, such as *B. anymana*, display strong developmental  
81 plasticity to cope with seasonally varying climatic conditions typical of the tropical zone: a wet  
82 season form adapted to the wet, warmer season favourable to reproduction, and a dry season  
83 form adapted to the cooler, stressful season with limited food resources and strongest selection  
84 for reproduction and survival. *B. anymana* thus provides morphological evidence of adaptation

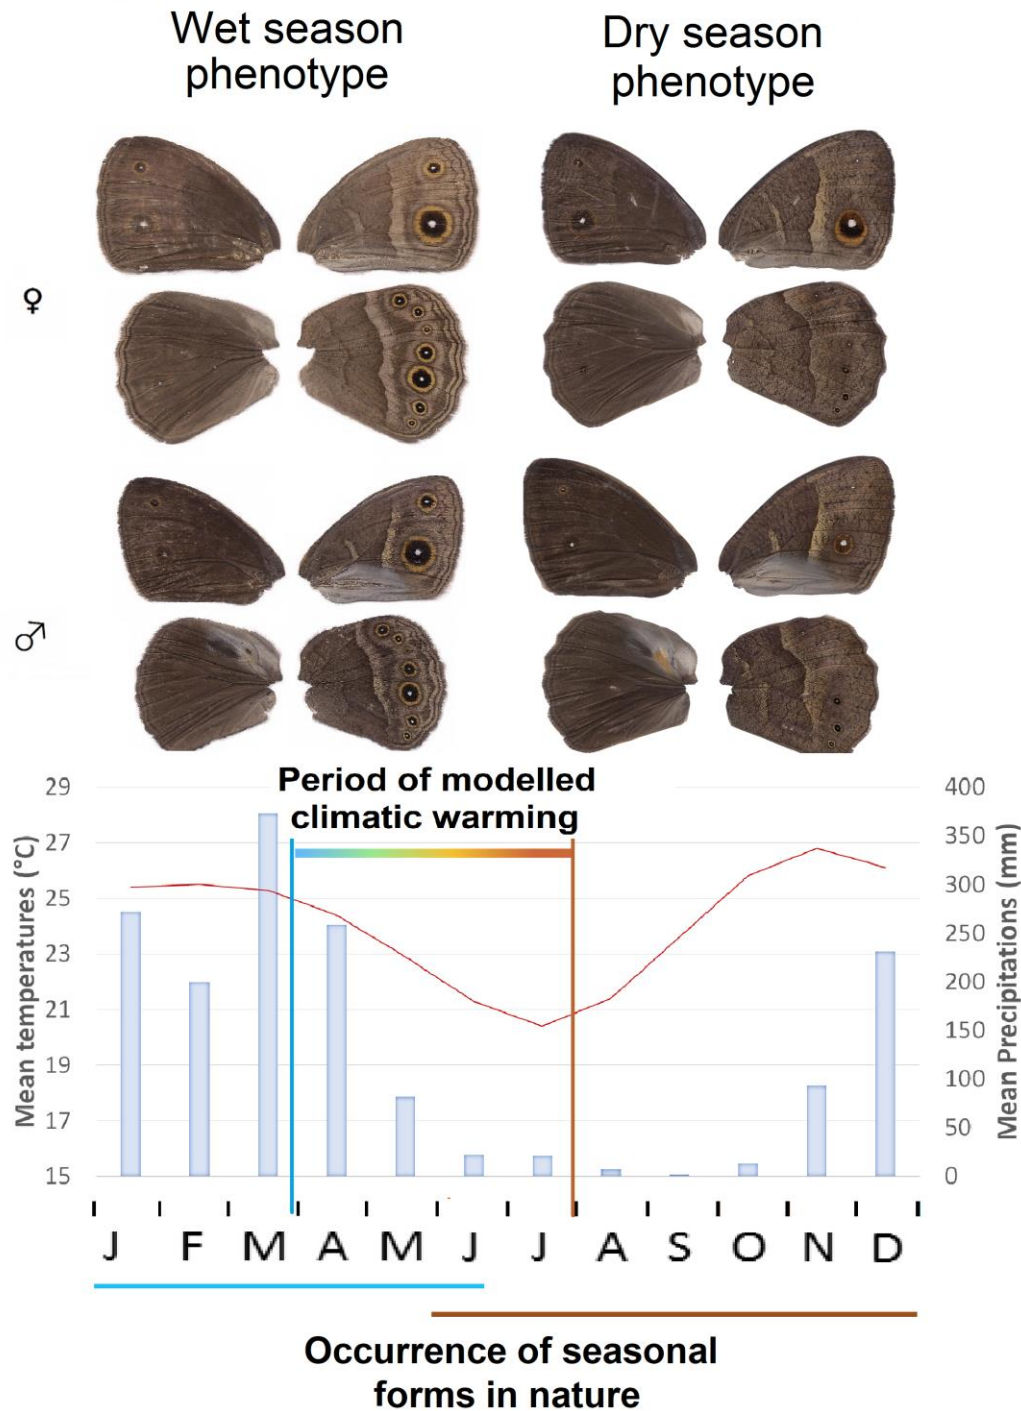

85

86 **Fig. 1.** Morphological differences of males and females between wet and dry season phenotypes  
87 and their temporal distribution across seasons in Malawi (Brakefield & Reitsma, 1991), in  
88 relation with monthly average values of precipitation (blue bars) and temperature (red curve) in  
89 the field (data available at (World-Bank-Group, 2019)). The 120-day period of the climatic  
90 warming we modelled (Julian day 88 to 192, as in Fig. 2) is depicted.

91 to changing, seasonal climates that is easy to track (Muller et al., 2019). We focused here on  
92 the transition from the wet to the dry season when both seasonal forms co-occur with an  
93 intermediate seasonal form whose presence can be abundant, but is transient in the wild  
94 (Brakefield et al., 2007; Brakefield & Reitsma, 1991; Prudic et al., 2011; Shapiro, 1976; Windig  
95 et al., 1994). Under current climatic conditions, wet and intermediate seasonal forms are  
96 progressively replaced by a single generation of dry season individuals that cope with harsher  
97 environmental conditions until the next wet season (Fig. 1; Fig. S1).

98         Here, we modelled the seasonal transition as it will occur in 2100 in the native  
99 population of our African butterfly, located in Malawi. Given that the production of phenotypes  
100 strongly depends on developmental temperature (Kooi & Brakefield, 1999), we expected that  
101 climate warming would lead to the production of wet season individuals at the beginning of the  
102 dry season due to the overall increase in temperature (prediction 1). To test how climate-induced  
103 changes in seasonal phenotypes affect sexual selection, we then quantified naive and learned  
104 mate preferences of females after exposure to males of the different seasonal forms. We  
105 expected naive females to prefer dry season males, because previous studies have shown that  
106 mating with dry season males increased female life expectancy and egg number compared to  
107 mating with wet season males (Prudic et al., 2011) (prediction 2). We further expected that  
108 social exposure to different male seasonal phenotypes will change mate preference of  
109 experienced compared to naive females (prediction 3). We also determined the effects of mating  
110 with different male seasonal forms on female survival and fertility as a proxy for reproductive  
111 fitness. We expected learning through social exposure to improve fitness and fertility of females  
112 mated with dry season males (prediction 4). Our results revealed that social learning of females  
113 about the availability of males with different adaptive values to warmer and colder climates  
114 produces learned sexual preferences that become maladaptive under climate warming.

115

116 **Results**

117 *Climate warming produces a maladaptive increase in wet season forms at the onset of the dry*  
118 *season*

119 We mimicked the entire wet to dry seasonal transition (120 days) as it occurs in Malawi  
120 (Brakefield et al., 2009) by implementing hour-to-hour modelled changes in temperature and  
121 humidity and monthly changes in photoperiod. Three climatic scenarios were applied to  
122 butterfly development: 1) climatic conditions reported for 1988 (“reference” scenario); 2) the  
123 expected climate in 2100, with a 3°C temperature increase; and 3) the expected climate in 2100,  
124 with a 6°C temperature increase. Overall, we found that the alternation of wet and dry seasons  
125 was maintained in 2100, with a wet season of 5 to 6 months. Under the warmest scenario,  
126 however, the average temperature of both seasons increased by a quantity comparable to the  
127 amplitude of the seasonal cycle (6°C, as was found for all examined models). Consequently,  
128 the higher temperatures typical of the wet season in 1988 will be common during the dry season  
129 in 2100 (Fig. S2).

130 We reared three successive cohorts of *B. anynana* larvae under these climatic conditions  
131 until adult emergence. Comparing the 1988 data to the +6°C climatic scenario, climate warming  
132 increased survival by 21% (Fig. 2a; Table S1), and reduced development time by half at the  
133 beginning of the seasonal transition (15.4 to 7.8 days), and by 74% (27.4 to 7.2 days) at the end  
134 (Fig. 2b; Table S1). An increase in survival and reduced development time are indeed expected  
135 for ectothermic species (Colinet et al., 2015). Regarding seasonal phenotypes, we found that  
136 climate warming increased the expression of the wet season phenotype throughout the seasonal  
137 transition (Fig. 2c). Although butterflies displayed an increasingly dry season phenotype  
138 throughout the seasonal transition under the current scenario (which can be expected as  
139 temperature and humidity decrease during the seasonal transition; Fig. 2c), development under  
140 the +3°C and +6°C climatic scenarios produced a wet season phenotype at the end of the



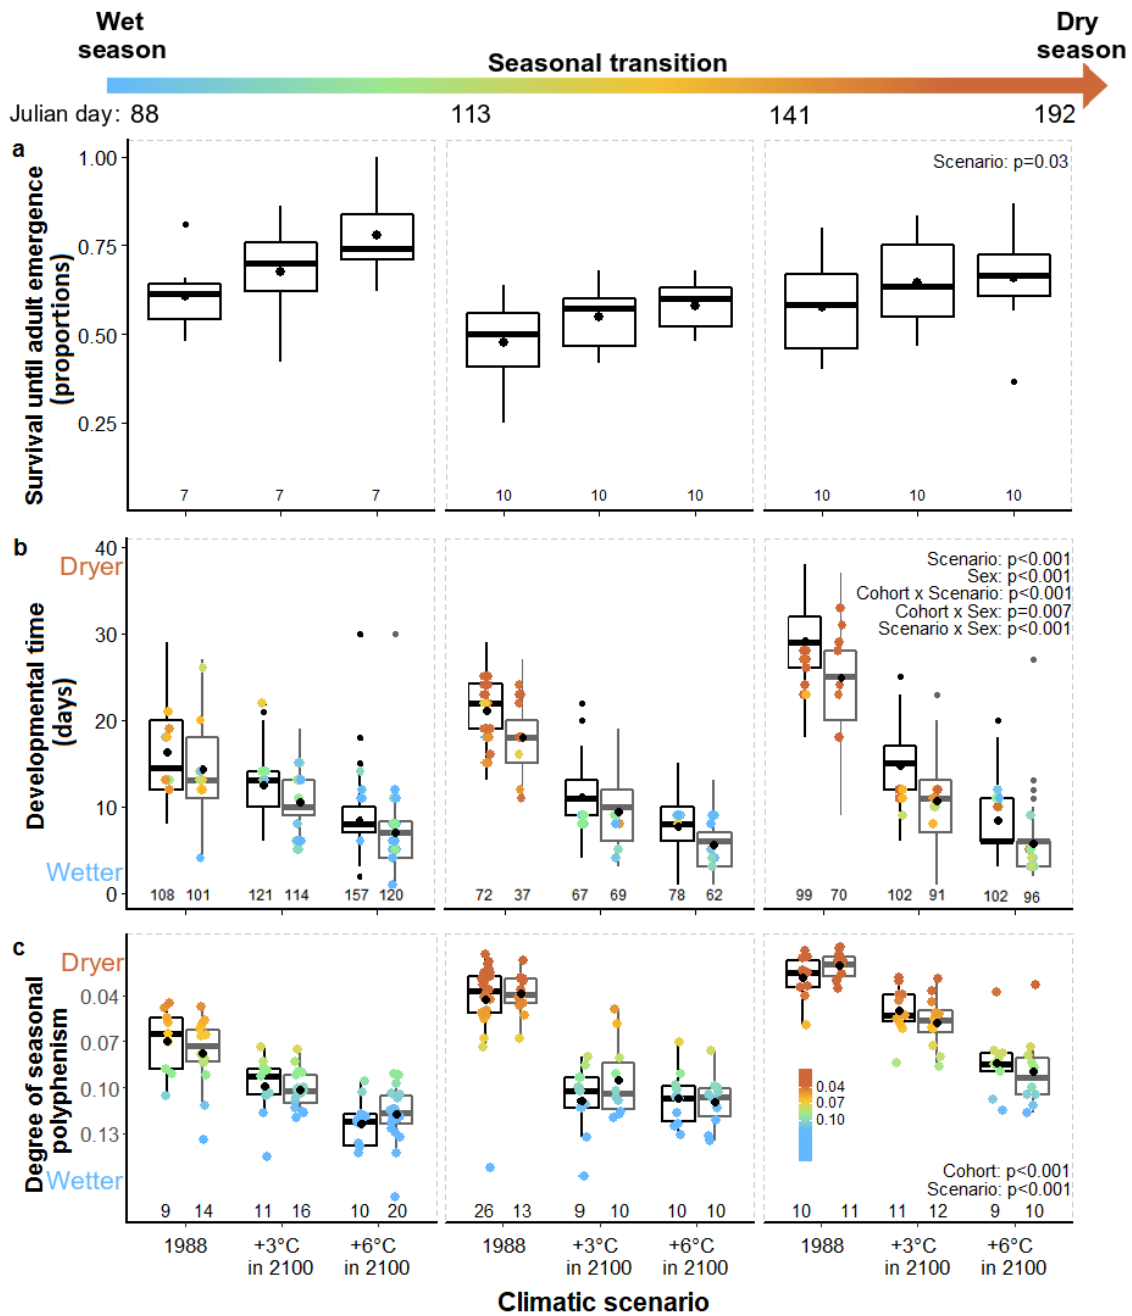

141

142 **Fig. 2.** Climate warming during the wet to dry seasonal transition increases the proportion of  
 143 surviving larvae until adult emergence (a), reduces developmental time (day 1 = first emerged  
 144 butterfly per cohort; b), and produces wet season butterflies at the onset of the dry season (c)  
 145 (Table S1). Data are presented from left to right using three cohorts of larvae whose  
 146 development cover the entire seasonal transition (cohort 1: from the 88<sup>th</sup> day of the year to the  
 147 112<sup>th</sup>, cohort 2 from the 113<sup>th</sup> to the 140<sup>th</sup> day and cohort 3 from the 141<sup>st</sup> to the 192<sup>th</sup> day). For  
 148 (b-c), colours indicate whether the individuals display the dry (brown), intermediate (yellow  
 149 and green), or wet (blue) season forms, based on the relative eyespot area of females (black)  
 150 and males (grey)(as in Muller et al., 2019). Mean values are indicated (black dot inside each  
 151 boxplot) and sample sizes (below each boxplot) are numbers of replicates in (a) and individuals  
 152 in (b-c).



153 seasonal transition. This wet seasonal form is typical for individuals developing at the beginning  
154 of the seasonal transition under 1988 climatic conditions, confirming our first prediction (Fig.  
155 2c). As the changes in humidity, the length of the seasonal transition, and the amplitude in  
156 temperature during the seasonal transition are similar between past and future climatic scenarios  
157 (Fig. S2), the appearance of the wet season form at the onset of the dry season in 2100 can be  
158 attributed to an increase in absolute temperature.

159         The question is how maladaptive the altered appearance of seasonal forms is. Seasonal  
160 polyphenism in *B. anynana* entails multiple morphological, physiological, behavioural, and life  
161 history traits improving survival in the corresponding wet or dry season (Brakefield et al., 2007;  
162 Pijpe et al., 2008), and the adaptive benefits of the dry season form in the dry season have  
163 clearly been demonstrated (Prudic et al., 2014; Simpson et al., 2011). Increased temperature at  
164 the onset of the dry season could further reduce vegetation cover, which will make the wet  
165 season phenotype even more conspicuous and maladapted to the dry season environment  
166 compared to the dry season phenotype (Prudic et al., 2014). In addition, the dry season form  
167 has a lifespan two to three times longer than that of the wet season form, both in the lab (Pijpe  
168 et al., 2007) and in the field (Brakefield & Reitsma, 1991), meaning that wet season individuals  
169 are less likely to survive throughout the dry season. In the wild, adults with mismatched wing  
170 patterns with respect to the season are rare in Malawi (e.g., only 8% of field caught individuals  
171 in Malawi belonged to the intermediate seasonal form across all seasons between 1988 and  
172 1991 (Windig et al., 1994)). Currently, the dry season in Malawi lasts 6 to 7 months, and  
173 although rainfall patterns and the length of the dry season are not expected to change after  
174 climate warming based on our simulations, emergence of wet season phenotypes that live  
175 shorter at the onset of the dry season are expected to increase the extinction risk of the  
176 population during the dry season.

177

178 ***Innate sexual preference for increasingly rare dry season males can increase population***  
179 ***extinction risk during the dry season***

180 Female lifespan and reproductive output depend on the seasonal form of her mating partner  
181 (Prudic et al., 2011). We focused on mate preference of wet season females, because this is the  
182 choosiest female seasonal form (Prudic et al., 2011) and wet season individuals prevail at the  
183 onset of the dry season under the 2100 climatic scenarios. We quantified naive (innate) female  
184 sexual preference for the different seasonal phenotypes that co-occur during the seasonal  
185 transition. Naive females preferred to mate with dry season males over intermediate or wet  
186 season males (Fig. 3a; Table S2): the mating proportions of dry season males were significantly  
187 higher, while the mating proportions of intermediate and wet season males were lower than  
188 expected based on phenotype-specific male courtship rate.

189         Innate preference for dry season males is adaptive, because females that mated with a  
190 dry season male increased their life expectancy by ~65% and laid between ~30 to ~240% more  
191 eggs compared to females mated with a wet season male, in line with our second prediction.  
192 Despite the sexual benefits of mating with dry season males, the innate preference for dry season  
193 males may, however, become maladaptive by 2100, because dry season males will become rare  
194 after climate warming, meaning that females will have to mate with wet season males, which  
195 we know reduces reproductive fitness. Mating with wet instead of dry season males may thus  
196 drastically reduce the proportion of females and developing eggs surviving the harsh, dry season  
197 until the next wet season, increasing the extinction risk of *B. anynana* populations.

198

199 ***Exposure to both seasonal male forms leads to maladaptive learned mate preferences***

200 Short-term exposure to males with artificial eyespot numbers is known to modify female mating  
201 preferences in *B. anynana* (Westerman et al., 2012). We thus hypothesized that changes in the

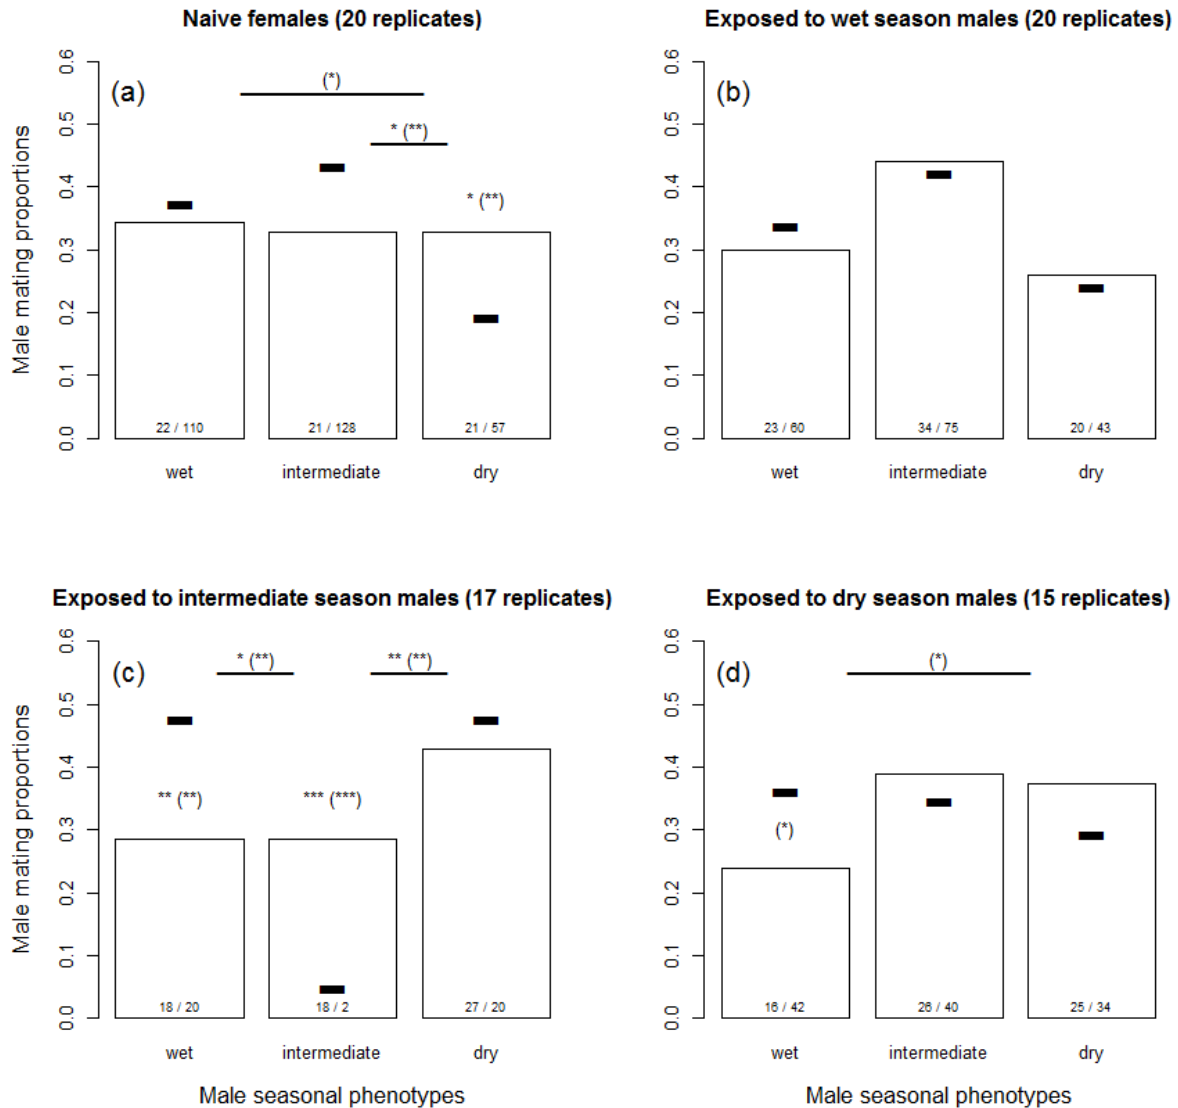

202

203 **Fig. 3.** Male mating success depends on the seasonal form (wet, intermediate or dry) and  
 204 whether females are naive (a) or have been previously exposed to wet (b), intermediate (c) or  
 205 dry season males (d). Adjusted Holm-Bonferroni *P*-values (and uncorrected *P*-values in  
 206 brackets) indicate significant differences (\* $<0.5$ , \*\* $<0.01$ , \*\*\* $<0.001$ ) between observed (bars)  
 207 and theoretical (dashes) mating proportions, after adjustment for courtship activity, for each  
 208 male phenotype and in paired comparisons between phenotypes (reported for each bar and  
 209 comparison; Supplementary Table S4). Samples sizes inside each bar are numbers of male  
 210 matings/courtships.

211

212

213 seasonal phenotype of males, which includes variation in eyespot size, modifies the innate mate  
 214 preference through learning, as in many other insects (Dion et al., 2019). To test this, we  
 215 exposed virgin, wet season females for a 3-hour period (as in Westerman et al., 2012) to wet

216 season males (the predominant form based on the 2100 scenarios; Fig. 3b), dry season males  
217 (the predominant form at the onset of the dry season based on past climatic conditions in  
218 Malawi; Fig. 3d), or intermediate seasonal phenotypes (found primarily during the seasonal  
219 transition in Malawi (Brakefield & Reitsma, 1991); Fig. 3c). Females had access to all  
220 phenotypic traits of males (i.e., olfactory, visual, and auditory), except for direct contact or  
221 mating. Overall, exposure of virgin wet season females to males of different seasonal forms  
222 induced a long-term (3 to 6 days) suppression of innate female preferences for dry season males  
223 (Fig. 3; Table S2), meaning that long-term memory formation was involved. In addition, pre-  
224 exposure to different male seasonal forms surprisingly increased female mate preference  
225 towards intermediate season males, compared to naive females (Fig. 3; Table S2). Indeed,  
226 mating proportions of intermediate season males either matched (Fig. 3b, d) or exceeded (Fig.  
227 3c) the expected mating rate based on courtship activity, as compared to their lower than  
228 expected mating numbers with naive females (Fig. 3a). The preference of wet season females  
229 for intermediate season males was highest when wet season females were exposed to  
230 intermediate season males (Fig. 3c; Table S2), in line with our third prediction.

231

### 232 *Learning of sexual preference affects female fitness*

233 We assessed the (mal)adaptive value of learning on mating preference by quantifying two  
234 fitness parameters of naive and experienced wet season females: longevity and fertilization  
235 success. In line with our fourth prediction, experienced females had reduced longevity (Fig. 4c),  
236 suggesting that social learning generates some costs (Barrett et al., 2019). In addition, the  
237 proportion of successfully fertilized eggs of naive females decreased when they mated with dry  
238 rather than with intermediate or wet season males (Fig. 4a). This contradicts the work of Prudic  
239 *et al.* (2011), suggesting that the fitness benefits of naive females mated with different types of

240

241 **Figure 4**

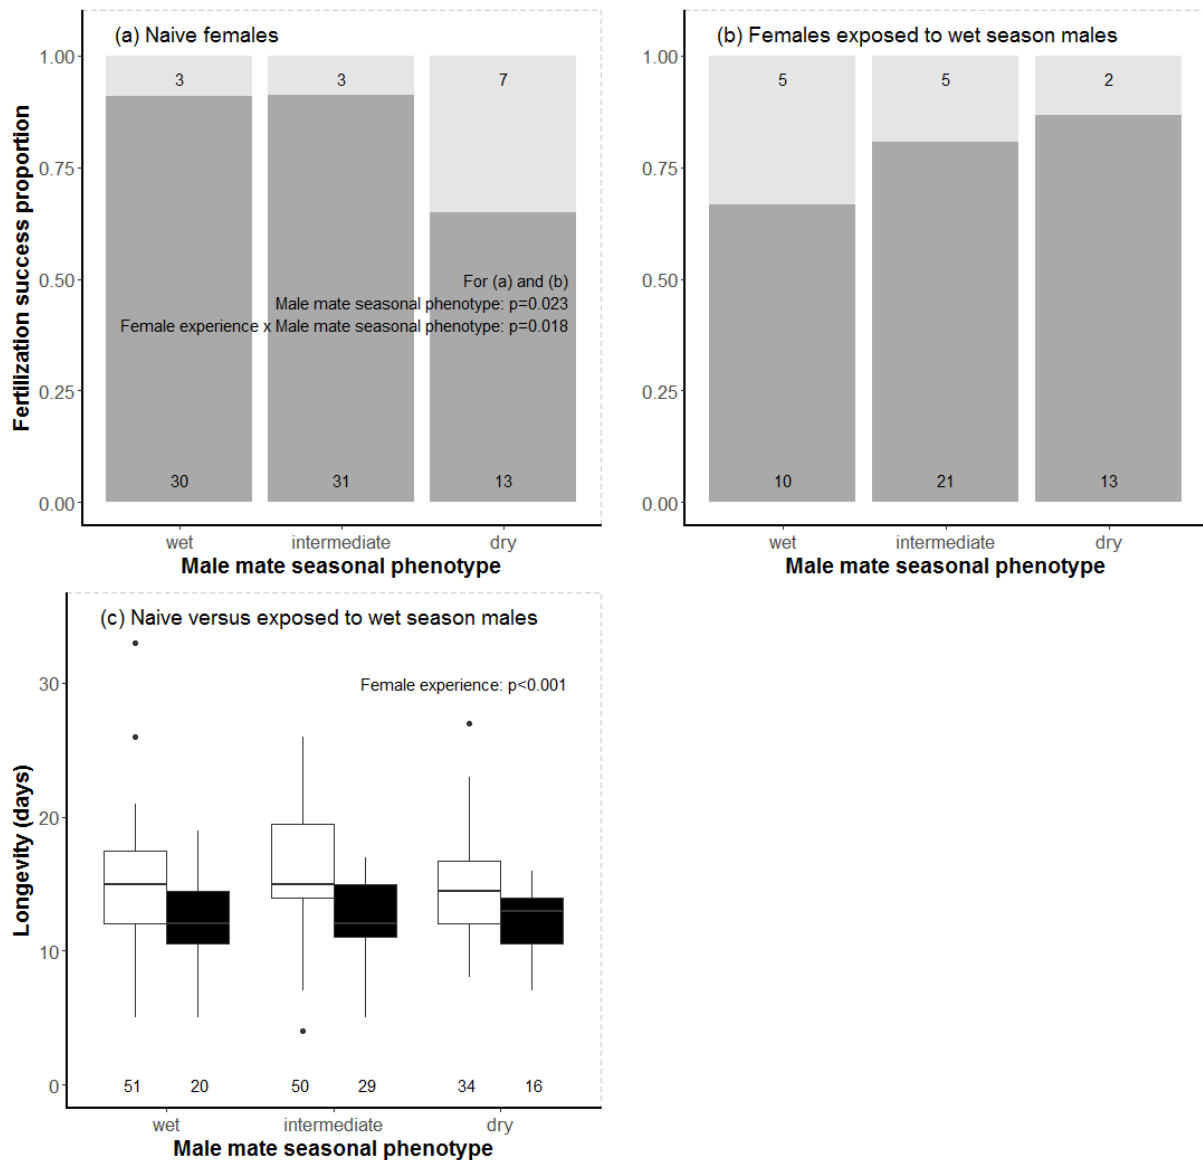

242

243 **Fig. 4.** Both the proportion of wet season females whose eggs were fertilized (a-b; in dark grey)  
244 and female longevity (c) differ depending on whether the females are naive (a) or have been  
245 exposed previously to wet season males (b). Naive and experienced females are depicted by  
246 white or black boxplots, respectively in (c). Fertilization success, but not longevity, also  
247 depends on the seasonal form (wet, intermediate, dry) of males. Sample sizes are given inside  
248 each bar or below each boxplot.

249

250 males depends on local environmental conditions, for which variation is known to affect the  
251 expression of sexual preference in *B. anynana* and in many other sexually reproducing species  
252 (e.g., choice or no-choice mating experiments, density, sex ratio (Holveck et al., 2015; Miller  
253 & Svensson, 2014; Nieberding & Holveck, 2018)). In contrast, experienced females displayed

254 the highest proportion of fertilization success after mating with dry season males (Fig. 4b; Table  
255 S1).

256 Social exposure of females to males of different seasonal phenotypes is likely adaptive  
257 by shifting learned mate preference towards available males under natural, past, climatic  
258 conditions. By 2100, social exposure of females to males of the wet season form will reduce  
259 their life expectancy (by 40%) and reproductive fitness (by at least 25%), adding to the negative  
260 effects on population survival chances throughout the dry season. Moreover, when females will  
261 be surrounded by wet season males at the onset of the dry season in 2100, social exposure will  
262 reduce their fertility by 23% compared to exposure and mating with dry season males, which is  
263 maladaptive. Reduced fertility adds up to the loss of the other direct benefits that females gain  
264 when mating with dry season males (increased life expectancy and oviposition rate (Prudic et  
265 al., 2011)).

266

## 267 **Discussion**

268 We have provided a first example of a learned sexual interaction that produces maladaptation  
269 under climate warming (Barrett et al., 2019; Greggor et al., 2019). As environmental cues  
270 become unreliable, in the case of *B. anynana* through temperature values that no longer predict  
271 the onset of the dry season, several maladaptive responses become apparent: *i*) production of  
272 the wet season form; *ii*) suppression of naive mate preference for dry season males after  
273 exposure to wet or intermediate season males; and *iii*) reduced longevity and fertilization  
274 success by experienced females mating with wet season males. This leads to an increased risk  
275 that long-term maintenance of the population is disrupted in the wild. While it remains difficult  
276 to predict the fate of *B. anynana* populations in Malawi based on available information  
277 (Candolin & Vlieger, 2013; Huey Raymond et al., 2012), our experimental results are relevant  
278 and important to consider for predicting responses in nature. In the field, most virgin females

279 likely get socially exposed to potential mates during the few days of sexual maturation  
280 following adult emergence, because this species is protandrous (i.e., males emerge before  
281 females), which we show induces a form of sexual imprinting. Maladaptation can be suppressed  
282 over evolutionary time by genetic evolution and gene flow. Notably, genetic adaptation can  
283 occur by selection on female mate preference, provided that there is genetic variance for innate  
284 and/or learned mate preference (Prokuda & Roff, 2014). As social learning is costly (in general,  
285 Mery & Kawecki, 2005; here, we find potential survival costs for *B. anynana*), and has a genetic  
286 basis (Barrett et al., 2019), maladaptive learned sexual preference could be counter-selected  
287 (Lotem, 1993).

288         There is significant gene flow among *B. anynana* populations across its distribution  
289 range (Bacquet et al., 2016; de Jong et al., 2011), thus more adapted populations from other  
290 parts of the distribution range may also replace the local Malawi population. The alternation  
291 and duration of the dry and wet seasons differs extensively with latitude across the distribution  
292 range of *B. anynana* (e.g., variation in seasons documented in Uganda; Phillips & McIntyre,  
293 2000). Yet, there is little genetic variation for seasonal polyphenism between geographically  
294 distant populations (de Jong et al., 2010). More southern populations develop into the wet  
295 season form at lower temperatures than the Malawi population (de Jong et al., 2010); hence  
296 southern immigrant butterflies would increase maladaptation to the Malawi climate by 2100.  
297 The patterns of temperature-rainfall correlation vary strongly throughout the large geographical  
298 range of *B. anynana*, and different regions are expected to pose different selection pressures on  
299 the species' plastic responses to temperature (de Jong et al., 2010; Roskam & Brakefield, 1999).  
300 *B. anynana* populations from the Northern hemisphere may use rainfall, and not temperature,  
301 as a cue for predicting the onset of the dry season (Roskam & Brakefield, 1999). Replacement  
302 of southern populations, such as Malawi, by northern populations could lead to the emergence  
303 of the dry season form at the onset of the dry season despite the increase in temperature.



304 However, local adaptation by genetic evolution may be very limited for the Malawi population  
305 of *B. anynana* because most mutations are non-adaptive (Brakefield et al., 2009), and because  
306 there is little genotypic variation for several aspects of seasonal polyphenism, both regarding  
307 the development of wing patterns in response to temperature (Wijngaarden et al., 2002) and  
308 other life history traits forming the wet or dry season phenotypes, such as starvation resistance  
309 and resting metabolic rate (Oostra et al., 2018).

310 The broader relevance of our results rests on two pillars. First, while learning is usually  
311 assumed to improve immediate adaptation to environmental variation (within the lifetime of an  
312 organism), the fitness effects of learning remain rarely assessed (Candolin & Wong, 2012b;  
313 Dion et al., 2019; Morand-Ferron et al., 2016; Nieberding et al., 2018). Here, we discovered  
314 that learning reverses both mate preference and its effects on longevity and reproductive fitness.  
315 Our results thus reveal that using behavioural data from naive individuals to predict sexual  
316 responses of animals may lead to erroneous conclusions. Whether learning increases or limits  
317 adaptation to sexual selection under climate warming remains largely undocumented so far (but  
318 see Botero et al., 2009 who found that more complex, learned male bird songs were present in  
319 more unpredictable and unfavourable climatic environments). Maladaptive or suboptimal  
320 learning was, however, previously found for foraging (Avarguès-Weber et al., 2018) and two  
321 recent reviews document that learning in response to HIREC is maladaptive for a large number  
322 of environmental threats and behaviours (Barrett et al., 2019; Greggor et al., 2019). We suggest  
323 that maladaptive learning in sexual interactions under HIREC may occur in many species, as  
324 most animals studied to date modify their sexual behaviours through learning (Dion et al., 2019;  
325 Verzijden et al., 2012), which could lead to evolutionary traps (Robertson et al., 2013).

326 Second, our results highlight the importance of sexual selection as a strong evolutionary  
327 force to include for quantifying species responses to HIREC, such as climate warming  
328 (Candolin, 2019; Candolin & Heuschele, 2008). The effect of natural selection on species

329 responses to the climate crisis has received considerable interest. Studies have shown that at the  
330 intraspecific level, climate warming leads to adaptive plastic and genetic changes in key  
331 phenotypic traits, including dispersal capacity and other morphological, physiological,  
332 behavioural, and life-history traits associated to phenology (Musolin & Saulich, 2012;  
333 Parmesan, 2006; Thackeray et al., 2016). However, the effects of anthropogenic environmental  
334 changes on sexual selection matter as well, because sexual selection may increase the extinction  
335 risk of populations (Holland, 2002; Martínez-Ruiz & Knell, 2017; Parrett & Knell, 2018;  
336 Plesnar-Bielak et al., 2012). It is indeed increasingly acknowledged that human activities  
337 disturb important aspects of sexual selection (e.g., eutrophication and turbidity including algal  
338 blooms (Seehausen et al., 1997), urban noise (Montague et al., 2013), selective harvest in  
339 hunting (Knell & Martínez-Ruiz, 2017). This is expected as sexual selection has a strong  
340 environmental component (Ingleby et al., 2010; Parrett & Knell, 2018). Regarding the climate  
341 crisis, sexual selection is altered through the availability of sexual partners (Twiss et al., 2007)  
342 with potential effects on the proportion of extra-pair mating opportunities (Bichet et al., 2016),  
343 relative fitness of mono- versus polyandrous females (Grazer & Martin, 2012a), assortative  
344 mating (Santos et al., 2018), sexual conflict (García-Roa et al., 2019), secondary sexual traits  
345 (Evans & Gustafsson, 2017), and mate preferences (Candolin, 2019; Fuxjäger et al., 2019). Our  
346 results suggest that the effect of global warming on *B. anynana* may lead to rapid extinction of  
347 populations within a single or a few dry seasons, due to cascading effects of learned sexual  
348 interactions and fitness of reproducing females at the onset of the dry, harsh, tropical season.

349         Our case study using the tropical butterfly *B. anynana* may be representative of a more  
350 general pattern, because butterflies are arthropods that represent most of the animal biomass  
351 and species diversity on Earth (Bar-On et al., 2018) and generally show strong phenotypic  
352 plasticity to cope with alternating seasons (Simpson et al., 2011). Furthermore, tropical biomes  
353 both contain most biodiversity and are most threatened by climate warming (Deutsch et al.,

354 2008; Hoffmann et al., 2013; Lister & Garcia, 2018; Sunday et al., 2011). Understanding how  
355 maladaptations arise is increasingly important as humans rapidly transform the Earth into an  
356 environment where maladaptation is expected to become prevalent for most species (Crespi,  
357 2000; Robertson et al., 2013). Our results suggest that global warming can have additive effects  
358 reducing, more than has been considered so far, the long-term survival probabilities of various  
359 taxa once learning and sexual selection are included as important biological mechanisms of  
360 species responses (Bell, 2013; Bradshaw & McNeilly, 1991). Our results thus advocate for  
361 integrating sexual selection, learning and their fitness consequences to better understand  
362 (mal)adaptation to climate warming.

363

## 364 **Methods**

### 365 *Insect rearing*

366 Experiments were performed with a laboratory population of *Bicyclus anynana* that was  
367 originally established from 80 gravid females collected in Malawi in 1988 (Brakefield et al.,  
368 2009). Between 400 and 600 butterflies per generation were used to maintain high levels of  
369 heterozygosity and polymorphism (Van't Hof et al., 2005) to avoid loss of genetic diversity in  
370 the lab population. Larvae were fed with maize, *Zea mays*, and adults with moist, organic  
371 banana, *Musa acuminata* (Brakefield et al., 2009). Insects were reared, kept, and tested in a  
372 large climate-controlled room (5.8 x 5.7 m and 2.27 m high) under a standard temperature  
373 regime ( $27 \pm 1^\circ\text{C}$ ; SD), a 12:12h light:dark regime and a high relative humidity ( $70 \pm 5\%$ )  
374 representing the wet season in the field (Brakefield et al., 2009), except when explicitly  
375 mentioned otherwise. For experiments, eggs were repeatedly collected from the stock  
376 population as described below. Eggs of all thermal treatments were first reared in the standard  
377 rearing environment at  $27^\circ\text{C}$ . Larvae were then placed in groups for the different thermal  
378 treatments from the 4<sup>th</sup> larval instar until the second half of their pupal stage (in sleeves),

379 because the developmental temperature experienced during this time window determines the  
380 expression of adult polyphenism (Bear & Monteiro, 2013; Brakefield & Reitsma, 1991; Kooi  
381 & Brakefield, 1999; Oostra et al., 2011). Newly emerged adults were sexed and individually  
382 marked on the ventral forewing with an indelible felt-tip pen. Groups of the same sex, seasonal  
383 form, and age of at most 10 males or 20 females were placed in cylindrical netted cages  
384 (diameter of 30 cm, height of 38 cm), except when stated otherwise. All experiments with adult  
385 butterflies were performed at a temperature of 27°C, unless mentioned otherwise.

386

### 387 *Climate warming and proportions of seasonal forms*

388 To test if climate warming leads to the production of wet season individuals at the beginning of  
389 the dry season, we modelled past and future natural, hourly, circadian cycles of both  
390 temperature and relative humidity for 104 consecutive days representing the transition from the  
391 wet to the dry season in Malawi (from March 30<sup>th</sup> to July 12<sup>th</sup>; Fig. S2). We modelled three  
392 climatic scenarios: the past climate in 1988, and two future scenarios, i.e., RCP4.5 and RCP8.5  
393 (with a 3°C and 6°C increase in the region of interest, respectively). The photoperiod followed  
394 the light decrease throughout the seasonal transition with a 15-min monthly step. We encoded  
395 the three modelled climatic scenarios in three separate incubators. Given the difficulty of  
396 obtaining reliable, in-situ meteorological data, we constructed an idealized, smooth seasonal  
397 cycle of temperature and relative humidity by averaging 10 years of meteorological data during  
398 1979-1989 [data from the Modern-Era Retrospective analysis for Research and Applications  
399 (MERRA), at latitude 12S and longitude 34E (Global-Modeling-and-Assimilation-Office-  
400 (GMAO))]. We then considered climate modulations available from the CMIP5 database at the  
401 same location (Taylor et al., 2012). Specifically, we computed the seasonal cycle of temperature  
402 anomalies (period 2080-2099 *versus* 1970-1990) of three models (CCSM4, HadGEM2-ES, and  
403 IPSL-CM5A-MR; at the time these data were downloaded, the HadGEM2-ES historical data

404 were available until 1984 only), and added them to the reference scenario. Simulations of  
405 relative and specific humidity tend to be less reliable; hence a different approach was needed.  
406 We considered that the important explanatory factor for our experiment is the duration and  
407 timing of the wet, rainy season. Consequently, we measured the simulated change in timing and  
408 duration of the wet season between 1970-1990 and 2080-2099, and expressed these changes as  
409 anomalies of relative humidity, based on the reference values of humidity throughout the dry  
410 and wet seasons in the reference seasonal cycle obtained from the MERRA dataset (Fig. S2).  
411 We retained the HadGEM2-ES model, because its climate sensitivity is intermediate and  
412 considers two future climatic scenarios, i.e., RCP4.5 (about 3°C increase in the region of  
413 interest) and RCP8.5 (6°C increase)(IPCC & Press, 2014), in addition to reference climatology  
414 for 1979-1989.

415 To cover the entire seasonal transition, we reared three cohorts of butterflies: 24 days in  
416 cohort 1, 28 days in cohort 2, and 35 to 50 days in cohort 3 (Fig. S2). Pupae were collected and  
417 placed in 1-dm<sup>3</sup> circular plastic boxes, after which butterflies were frozen at -80°C. We then  
418 evaluated the effects of global warming on survival until adult emergence (proportion of  
419 surviving individuals between the start of the thermal treatment and the first day of emergence),  
420 developmental time (day 1 = first emerged butterfly per cohort), and adult polyphenism using  
421 the relative area of the fifth eyespot on the right ventral hindwing (i.e., hv5; Muller et al., 2019;  
422 Fig. 2).

423

#### 424 *Mating success of different male seasonal forms with naive and experienced females*

425 To test how the seasonal phenotype of males during the seasonal transition affects sexual  
426 selection, we produced the wet (temperature of 27°C), intermediate (23°C), and dry (17°C)  
427 seasonal forms (Brakefield et al., 2007; Brakefield & Reitsma, 1991; Muller et al., 2019; Oostra  
428 et al., 2011; Prudic et al., 2011). We obtained naive wet season females by placing all wet

429 season pupae individually in closed plastic cylindrical containers (diameter 3.5 cm, height 7  
430 cm, 60 ml) and adding a piece of white paper sheet to prevent visual, olfactory, gustatory and  
431 acoustic contact with other individuals. We obtained experienced wet season females by  
432 exposing freshly emerged females to 8-16-day-old males of one seasonal form in a flight cage  
433 (10 to 15 males per cage of 60 x 60 x 60 cm) during 3 hours. Males within the same age range  
434 were used for all exposures during experiments to more accurately mimic natural conditions.  
435 Experienced females were kept separately in their container with a custom-modified, wire mesh  
436 cap (7 x 7 mm), allowing them to see, smell and touch the flying males above them, but  
437 preventing any mating or visual and gustative contacts with the other females exposed at the  
438 same time (maximum 30 females spaced 5 cm apart). The males used for exposure were  
439 different than those used for subsequent mating experiments. All females were fed with a slice  
440 of banana in their individual container.

441 We used male courtship activity as theoretical mating proportions because *B. anynana*  
442 females, as in many insects, do not engage in mating activities unless a male initiates courtship.  
443 In addition, male courtship activity is known to (i) reduce butterfly survival (Wedell, 2010), (ii)  
444 differ among seasonal forms (Bear & Monteiro, 2013), and (iii) predict male mating success  
445 (Holveck et al., 2015; Nieberding & Holveck, 2017, 2018). We ran four mating experiments:  
446 one with naive wet season females (20 replicates) and three with experienced wet season  
447 females, either exposed the day of their emergence to wet (20 replicates), intermediate (17  
448 replicates), or dry season males (15 replicates). For each replicate 15 virgin males (i.e., 5  
449 selected randomly from each of the three thermal treatments), 8 to 11 days of age, were left to  
450 compete in the presence of 5 virgin, wet season females, 3 to 6 days of age, in semi-natural  
451 conditions (Holveck et al., 2015; Nieberding & Holveck, 2017, 2018). Eight to 11-day-old  
452 virgin males were used, because all three components of the male sex pheromone are present at  
453 significant levels at this age (Heuskin et al., 2014; Nieberding et al., 2008, 2012). We used 3-

454 6-day-old virgin females as females readily mate at this age in the laboratory (Brakefield et al.,  
455 2009; Nieberding et al., 2008, 2012). These ages also match the general age of females in  
456 behavioural experiments with this species (Holveck et al., 2015; Nieberding & Holveck, 2017).  
457 We first introduced the males into the experimental area and left them to adapt and interact with  
458 one another for 1 hour, after which females were added. Experimental cages (120 x 59 x 60 cm)  
459 containing two maize plants to increase perching and hiding opportunities were used, and moist  
460 cotton with banana slices provided. This cage size, a density below the recommended threshold  
461 of 0.1 individual/dm<sup>3</sup> for *B. anynana*, and a sex ratio of 3 males for 1 female within the species-  
462 specific range creates semi-natural conditions and allows the full expression of courtship  
463 display by males (including flight), and of female mate choice that allows rejection of a male  
464 by flying away from an unwanted male (Holveck et al., 2015; Nieberding & Holveck, 2017,  
465 2018). Each replicate was observed for 10 min every 30 min, with total observation duration of  
466 30 min per replicate. Direct behavioural observations for these 10 min were encoded using the  
467 software The Observer 5.0 (Noldus Information Technology, Wageningen, The Netherlands)  
468 and when a male started courting a female, we followed this courtship until it ended before  
469 focusing on another male. Throughout each experiment, we noted the identity of mates of all  
470 formed couples.

471

#### 472 *Fitness of wet season females mated with different male seasonal forms*

473 To test the fitness consequences of social learning in females, we measured fertilization success  
474 of eggs laid by either naive or experienced wet season females mated with males of different  
475 seasonal forms, as well as female longevity (details in Supplementary Methods). After  
476 experiments were finished, both naive and experienced females were singly placed in a 1-dm<sup>3</sup>  
477 plastic box with wet cotton as water supply and a maize leaf to oviposit (Brakefield et al., 2009).  
478 Part of the females obtained from the mating success experiments (i.e., all 57 naive females,



479 and 9 females exposed to wet season males) also received banana slices *ad libitum*. Every three  
480 days, we replaced leaves and checked egg fertilization success, as well as female longevity (i.e.,  
481 number of days between butterfly emergence and death).

482

### 483 *Statistical analyses*

484 We performed all statistics with RStudio 1.0.143 (RStudio 2016). First, we analysed the effect  
485 of the climatic scenarios in interaction with cohort on the *survival until adult emergence* using  
486 generalized linear mixed models GLMM (lme4 package in R (Bates et al., 2015) with a  
487 binomial distribution (logit link function) and bobyqa optimizer. The number of successfully  
488 emerged butterflies and the number of experimental larvae not surviving to adulthood were  
489 bound together with the “cbind” function. Random factors were cohort identity nested in  
490 scenario identity, i.e., scenario(cohort). We added the interaction with sex (categorical variable)  
491 to analyse fixed effects on *developmental time* and the *relative area of adult polyphenic hv5*  
492 *eyespot pupils* (with a Box-Cox transformation to achieve normality) using GLMM with a  
493 Poisson distribution, a bobyqa optimizer and an observation-level random effect to capture  
494 overdispersion (Elston et al., 2001; Holveck et al., 2015), and with a normal distribution,  
495 respectively. Random and nested factors were scenario(cohort(sleeve)).

496 We analysed the effect of male thermal treatment (17, 23, or 27°C) and female  
497 experience (naive or exposed to wet season males) on *female fitness and survival* as follows: (i)  
498 we analysed the effects of male thermal treatment in interaction with female experience on  
499 *fertilization success* (binary). We added the age at mating of both sexes and the thermal  
500 treatment duration (i.e., proportion of time that the female pupae spent in thermal treatment  
501 relatively to the entire pupation stage) as fixed factors. We used a GLMM with a binomial  
502 distribution, a bobyqa optimizer and an observation-level random effect to capture  
503 overdispersion. Feeding status after mating was starved for all females; (ii) we ran a similar

504 GLMM on *female longevity* with a Poisson distribution, in adding female feeding status after  
505 mating in interaction with male thermal treatment and whether or not females could choose  
506 among males of the different thermal treatments as fixed factors, and  
507 experimenter(experiment(replicate)) as random factors. In all these analyses, we rescaled and  
508 centred the continuous explanatory variables on the mean, thus generating standardized z-  
509 scores, to evaluate the relative effects of variables measured on different scales and to lessen  
510 the correlation between the interactions and their component variables.

511 In the analyses of mating success experiments, we first tested for homogeneity among  
512 replicates per experiment using a Pearson's Chi-squared test (with simulated  $P$ -value based on  
513  $1^{e+06}$  replicates to obtain a correct approximation; all  $P > 0.05$ ) before performing analyses on  
514 the pooled data set. Second, we tested differences in *mating probabilities* among males of  
515 different seasonal phenotypes in comparing the observed counts to the theoretical counts of  
516 mating of the three male thermal treatments per experiment using Pearson's Chi-squared tests  
517 of goodness-of-fit. Third, we searched for the male phenotype(s) responsible for these  
518 differences in comparing the observed counts to the theoretical counts of mating (*i*) for each of  
519 the three male thermal treatments per experiment and (*ii*) in paired comparisons between male  
520 phenotypes per experiment, applying Pearson's Chi-squared tests and reporting  $P$ -values with  
521 and without Holm-Bonferroni correction for multiple comparisons (Millot, 2009). We also  
522 performed Fisher's Exact tests when the expected frequencies were below 5.

523

## 524 **Acknowledgements**

525 We would like to thank Hans van Dyck for sharing his insect rearing facilities, as well as  
526 Philippe Vernon, Franjo Weissing, Magdalena Kozielska, and Georges Lognay for careful and  
527 insightful comments on previous versions of this manuscript. This research was supported by a  
528 "FRIA" PhD grant to DM and a "Chargée de Recherches" postdoctoral grant to MJH provided

529 by the National Fund for Scientific Research (FNRS) of Belgium. This work was further funded  
530 through UCLouvain and the Fédération Wallonie-Bruxelles (Grant ARC 17/22-086) to CN.  
531 This is publication BRC350 of the Biodiversity Research Centre.

532

### 533 **Competing interests**

534 The authors declare no competing financial interests.

535

### 536 **Data availability**

537 All data described in this paper is available at <https://nieberdinglab.be> and <https://visserlab.be>

538

### 539 **References**

540 Avarguès-Weber, A., Lachlan, R., & Chittka, L. (2018). Bumblebee social learning can lead to

541 suboptimal foraging choices. *Animal Behaviour*, *135*, 209–214.

542 <https://doi.org/10.1016/j.anbehav.2017.11.022>

543 Bacquet, P. M. B., de Jong, M. A., Brattström, O., Wang, H., Molleman, F., Heuskin, S., Lognay, G.,

544 Löfstedt, C., Brakefield, P. M., Vanderpoorten, A., & Nieberding, C. M. (2016). Differentiation in

545 putative male sex pheromone components across and within populations of the African

546 butterfly *Bicyclus anynana* as a potential driver of reproductive isolation. *Ecology and Evolution*,

547 *6*, 6064–6084. <https://doi.org/10.1002/ece3.2298>

548 Bar-On, Y. M., Phillips, R., & Milo, R. (2018). The biomass distribution on Earth. *Proceedings of the*

549 *National Academy of Sciences of the United States of America*, *115*(25), 6506.

550 <https://doi.org/10.1073/pnas.1711842115>

551 Barrett, B., Zepeda, E., Pollack, L., Munson, A., & Sih, A. (2019). Counter-Culture: Does Social Learning

552 Help or Hinder Adaptive Response to Human-Induced Rapid Environmental Change? *Frontiers in*

553 *Ecology and Evolution*, *7*(183). <https://doi.org/10.3389/fevo.2019.00183>

- 554 Bates, D., Maechler, M., Bolker, B., & Walker, S. (2015). Fitting linear mixed-effects models using  
555 lme4. *Journal of Statistical Software*, 67, 1–48.
- 556 Bear, A., & Monteiro, A. (2013). Male courtship rate plasticity in the butterfly *Bicyclus anynana* is  
557 controlled by temperature experienced during the pupal and adult stages. *PLoS ONE*, 8, 5–10.
- 558 Bell, G. (2013). Evolutionary rescue and the limits of adaptation. *Philosophical Transactions of the*  
559 *Royal Society of London. Series B, Biological Sciences*, 368(1610), 20120080.  
560 <https://doi.org/10.1098/rstb.2012.0080>
- 561 Bichet, C., Allainé, D., Sauzet, S., & Cohas, A. (2016). Faithful or not: direct and indirect effects of  
562 climate on extra-pair paternities in a population of Alpine marmots. *Proceedings of the Royal*  
563 *Society B: Biological Sciences*, 283(1845), 20162240. <https://doi.org/10.1098/rspb.2016.2240>
- 564 Botero, C. A., Boogert, N. J., Vehrencamp, S. L., & Lovette, I. J. (2009). Climatic patterns predict the  
565 elaboration of song displays in mockingbirds. *Current Biology*, 19, 1151–1155.  
566 <https://doi.org/10.1016/j.cub.2009.04.061>
- 567 Botero, C. A., Weissing, F. J., Wright, J., & Rubenstein, D. R. (2015). Evolutionary tipping points in the  
568 capacity to adapt to environmental change. *Proceedings of the National Academy of Sciences*,  
569 112, 184–189. <https://doi.org/10.1073/pnas.1408589111>
- 570 Bradshaw, A. D., & McNeilly, T. (1991). Evolutionary response to global climatic change. *Annals of*  
571 *Botany*, 67, 5–14. <http://www.jstor.org/stable/42758386>
- 572 Brakefield, P. M., Beldade, P., & Zwaan, B. J. (2009). The African butterfly *Bicyclus anynana*: A model  
573 for evolutionary genetics and evolutionary developmental biology. *Cold Spring Harbor*  
574 *Protocols*, 4, 1–10.
- 575 Brakefield, P. M., Pijpe, J., & Zwaan, B. J. (2007). Developmental plasticity and acclimation both  
576 contribute to adaptive responses to alternating seasons of plenty and of stress in *Bicyclus*

- 577 butterflies. *Journal of Biosciences*, 32, 465–475.
- 578 Brakefield, P. M., & Reitsma, N. (1991). Phenotypic plasticity, seasonal climate and the population  
579 biology of *Bicyclus* butterflies (Satyridae) in Malawi. *Ecological Entomology*, 16, 291–303.
- 580 Brown, R. L. (2013). Learning, evolvability and exploratory behaviour: Extending the evolutionary  
581 reach of learning. *Biology and Philosophy*, 28(6), 933–955. [https://doi.org/10.1007/s10539-013-](https://doi.org/10.1007/s10539-013-9396-9)  
582 9396-9
- 583 Cahill, A. E., Aiello-Lammens, M. E., Fisher-Reid, M. C., Hua, X., Karanewsky, C. J., Ryu, H. Y., Sbeglia,  
584 G. C., Spagnolo, F., Waldron, J. B., Warsi, O., & Wiens, J. J. (2013). How does climate change  
585 cause extinction? *Proceedings of the Royal Society B: Biological Sciences*, 280(1750), 20121890.  
586 <https://doi.org/10.1098/rspb.2012.1890>
- 587 Candolin, U. (2019). Mate choice in a changing world. *Biological Reviews*.  
588 <https://doi.org/10.1111/brv.12501>
- 589 Candolin, U., & Heuschele, J. (2008). Is sexual selection beneficial during adaptation to environmental  
590 change? *Trends in Ecology and Evolution*, 23(8), 446–452.  
591 <https://doi.org/10.1016/j.tree.2008.04.008>
- 592 Candolin, U., & Vlieger, L. (2013). Estimating the dynamics of sexual selection in changing  
593 environments. *Evolutionary Biology*, 40(4), 589–600. [https://doi.org/10.1007/s11692-013-9234-](https://doi.org/10.1007/s11692-013-9234-7)  
594 7
- 595 Candolin, U., & Wong, B. B. M. (2012a). *Behavioural Responses to a Changing World. Mechanisms  
596 and Consequences* (First Edit). Oxford University Press.
- 597 Candolin, U., & Wong, B. B. M. (2012b). Sexual selection in changing environments: consequences for  
598 individuals and populations. In U. Candolin & B. B. M. Wong (Eds.), *Behavioural Responses to a  
599 Changing World. Mechanisms and Consequences* (First Edit, pp. 201–215). Oxford University

- 600 Press.
- 601 Colinet, H., Sinclair, B. J., Vernon, P., & Renault, D. (2015). Insects in fluctuating thermal  
602 environments. *Annual Review of Entomology*, *60*, 123–140.
- 603 Crespi, B. J. (2000). The evolution of maladaptation. *Heredity*, *84*(6), 623–629.  
604 <https://doi.org/10.1046/j.1365-2540.2000.00746.x>
- 605 de Jong, M. A., Kesbeke, F. M. N. H., Brakefield, P. M., & Zwaan, B. J. (2010). Geographic variation in  
606 thermal plasticity of life history and wing pattern in *Bicyclus anynana*. *Climate Research*, *43*(1–  
607 2), 91–102. <https://doi.org/10.3354/cr00881>
- 608 de Jong, M. A., Wahlberg, N., van Eijk, M., Brakefield, P. M., & Zwaan, B. J. (2011). Mitochondrial DNA  
609 signature for range-wide populations of *Bicyclus anynana* suggests a rapid expansion from  
610 recent refugia. *PLoS ONE*, *6*(6). <https://doi.org/10.1371/journal.pone.0021385>
- 611 Deutsch, C. A., Tewksbury, J. J., Huey, R. B., Sheldon, K. S., Ghalambor, C. K., Haak, D. C., & Martin, P.  
612 R. (2008). Impacts of climate warming on terrestrial ectotherms across latitude. *Proceedings of*  
613 *the National Academy of Sciences of the United States of America*, *105*(18), 6668.  
614 <https://doi.org/10.1073/pnas.0709472105>
- 615 Dion, E., Monteiro, A., & Nieberding, C. M. (2019). The role of learning on insect and spider sexual  
616 behaviors, sexual trait evolution, and speciation. *Frontiers in Ecology and Evolution*, *6*.  
617 <https://doi.org/10.3389/fevo.2018.00225>
- 618 Dukas, R. (2017). Cognitive innovations and the evolutionary biology of expertise. *Philosophical*  
619 *Transactions of the Royal Society B: Biological Sciences*, *372*(1735).  
620 <https://doi.org/10.1098/rstb.2016.0427>
- 621 Elston, D. A., Moss, R., Boulinier, T., Arrowsmith, C., & Lambin, X. (2001). Analysis of aggregation, a  
622 worked example: numbers of ticks on red grouse chicks. *Parasitology*, *122*(5), 563–569.

- 623 <https://doi.org/doi:10.1017/s0031182001007740>
- 624 Evans, S. R., & Gustafsson, L. (2017). Climate change upends selection on ornamentation in a wild  
625 bird. *Nature Ecology and Evolution*, 1(2). <https://doi.org/10.1038/s41559-016-0039>
- 626 Fuxjäger, L., Wanzenböck, S., Ringler, E., Wegner, K. M., Ahnelt, H., & Shama Lisa, N. S. (2019).  
627 Within-generation and transgenerational plasticity of mate choice in oceanic stickleback under  
628 climate change. *Philosophical Transactions of the Royal Society B: Biological Sciences*, 374,  
629 20180183. <https://doi.org/10.1098/rstb.2018.0183>
- 630 García-Roa, R., Chirinos, V., & Carazo, P. (2019). The ecology of sexual conflict: temperature variation  
631 in the social environment can drastically modulate male harm to females. *Functional Ecology*.  
632 <https://doi.org/10.1111/1365-2435.13275>
- 633 Global-Modeling-and-Assimilation-Office-(GMAO). (n.d.). *MAT1NXSLV (Goddard Space Flight Center*  
634 *Distributed Active Archive Center (GSFC DAAC), Greenbelt, MD, USA, 2008*).
- 635 Grazer, V. M., & Martin, O. Y. (2012a). Elevated temperature changes female costs and benefits of  
636 reproduction. *Evolutionary Ecology*, 26(3), 625–637. [https://doi.org/10.1007/s10682-011-9508-](https://doi.org/10.1007/s10682-011-9508-4)  
637 4
- 638 Grazer, V. M., & Martin, O. Y. (2012b). Investigating climate change and reproduction: experimental  
639 tools from evolutionary biology. *Biology*, 1(2), 411–438.  
640 <https://doi.org/10.3390/biology1020411>
- 641 Greggor, A. L., Trimmer, P. C., Barrett, B. J., & Sih, A. (2019). Challenges of Learning to Escape  
642 Evolutionary Traps. *Frontiers in Ecology and Evolution*, 7(408).  
643 <https://doi.org/10.3389/fevo.2019.00408>
- 644 Heuskin, S., Vanderplanck, M., Bacquet, P., Holveck, M. J., Kaltenpoth, M., Engl, T., Pels, C., Taverne,  
645 C., Lognay, G., & Nieberding, C. M. (2014). The composition of cuticular compounds indicates



- 646 body parts, sex and age in the model butterfly *Bicyclus anynana*. *Frontiers in Ecology and*  
647 *Evolution*, 2, 37. <https://doi.org/10.3389/fevo.2014.00037>
- 648 Hoffmann, A. A., Chown, S. L., & Clusella-Trullas, S. (2013). Upper thermal limits in terrestrial  
649 ectotherms: how constrained are they? *Functional Ecology*, 27, 934–949.  
650 <https://doi.org/10.1111/j.1365-2435.2012.02036.x>
- 651 Holland, B. (2002). Sexual selection fails to promote adaptation to a new environment. *Evolution*,  
652 56(4), 721–730. <https://doi.org/10.1111/j.0014-3820.2002.tb01383.x>
- 653 Holveck, M.-J., Gauthier, A.-L., & Nieberding, C. M. (2015). Dense, small and male-biased cages  
654 exacerbate male-male competition and reduce female choosiness in *Bicyclus anynana*.  
655 *Animal Behaviour*, 104, 229–245.
- 656 Huey Raymond, B., Kearney Michael, R., Krockenberger, A., Holtum Joseph, A. M., Jess, M., &  
657 Williams Stephen, E. (2012). Predicting organismal vulnerability to climate warming: roles of  
658 behaviour, physiology and adaptation. *Philosophical Transactions of the Royal Society B:*  
659 *Biological Sciences*, 367(1596), 1665–1679. <https://doi.org/10.1098/rstb.2012.0005>
- 660 Ingleby, F. C., Hunt, J., & Hosken, D. J. (2010). The role of genotype-by-environment interactions in  
661 sexual selection. *Journal of Evolutionary Biology*, 23(10), 2031–2045.  
662 <https://doi.org/10.1111/j.1420-9101.2010.02080.x>
- 663 IPBES. (2019). *Global assessment report on biodiversity and ecosystem services of the*  
664 *Intergovernmental Science-Policy Platform on Biodiversity and Ecosystem Services* (E. S.  
665 Brondizio, J. Settele, S. Díaz, & H. T. Ngo (eds.)).
- 666 IPCC, & Press, C. U. (2014). *ARE5 climate change 2014: impacts, adaptation and vulnerability*.
- 667 Knell, R. J., & Martínez-Ruiz, C. (2017). Selective harvest focused on sexual signal traits can lead to  
668 extinction under directional environmental change. *Proceedings of the Royal Society B:*

- 669 *Biological Sciences*, 284(1868). <https://doi.org/10.1098/rspb.2017.1788>
- 670 Kokko, H., & Brooks, R. (2003). Sexy to die for? Sexual selection and the risk of extinction. *Annales*  
671 *Zoologici Fennici*, 40(2), 207–219. <https://www.scopus.com/inward/record.uri?eid=2-s2.0-0012734665&partnerID=40&md5=0c909effaeabb92659ca5aae3d7235fe>
- 672
- 673 Kooi, R. E., & Brakefield, P. M. (1999). The critical period for wing pattern induction in the polyphenic  
674 tropical butterfly *Bicyclus anynana* (Satyridae). *Journal of Insect Physiology*, 45, 201–212.
- 675 Lister, B. C., & Garcia, A. (2018). Climate-driven declines in arthropod abundance restructure a  
676 rainforest food web. *Proceedings of the National Academy of Sciences of the United States of*  
677 *America*, 115(44), E10397. <https://doi.org/10.1073/pnas.1722477115>
- 678 Lotem, A. (1993). Learning to recognize nestlings is maladaptive for cuckoo *Cuculus canorus* hosts.  
679 *Nature*, 362(6422), 743–745. <https://doi.org/10.1038/362743a0>
- 680 Martínez-Ruiz, C., & Knell, R. J. (2017). Sexual selection can both increase and decrease extinction  
681 probability: reconciling demographic and evolutionary factors. *Journal of Animal Ecology*, 86(1),  
682 117–127. <https://doi.org/10.1111/1365-2656.12601>
- 683 Mery, F., & Kawecki, T. J. (2005). A cost of long-term memory in *Drosophila*. *Science*, 308(5725),  
684 1148. <https://doi.org/10.1126/science.1111331>
- 685 Miller, C. W., & Svensson, E. I. (2014). Sexual selection in complex environments. *Annual Review of*  
686 *Entomology*, 59, 427–445.
- 687 Millot, G. (2009). *Comprendre et réaliser les tests statistiques à l'aide de R: Vol. 2ème édit.* De Boeck.
- 688 Montague, M. J., Danek-Gontard, M., & Kunc, H. P. (2013). Phenotypic plasticity affects the response  
689 of a sexually selected trait to anthropogenic noise. *Behavioral Ecology*, 24(2), 342–348.  
690 <https://doi.org/10.1093/beheco/ars169>

- 691 Morand-Ferron, J., Cole, E. F., & Quinn, J. L. (2016). Studying the evolutionary ecology of cognition in  
692 the wild: a review of practical and conceptual challenges. *Biological Reviews*, *91*(2), 367–389.  
693 <https://doi.org/10.1111/brv.12174>
- 694 Muller, D., Elias, B., Collard, L., Pels, C., Holveck, M.-J., & Nieberding, C. M. (2019). Polyphenism of  
695 visual and chemical secondary sexually-selected wing traits in the butterfly *Bicyclus anynana*:  
696 How different is the intermediate phenotype? *PLOS ONE*, *14*(11), e0225003.  
697 <https://doi.org/10.1371/journal.pone.0225003>
- 698 Musolin, D. L., & Saulich, A. K. (2012). Responses of insects to the current climate changes: from  
699 physiology and behavior to range shifts. *Entomological Review*, *92*(7), 715–740.  
700 <https://doi.org/10.1134/s0013873812070019>
- 701 Nesse, R. M. (2005). Maladaptation and natural selection. *The Quarterly Review of Biology*, *80*(1), 62–  
702 70. <https://doi.org/10.1086/431026>
- 703 Nieberding, C. M., de Vos, H., Schneider, M. V., Lassance, J. M., Estramil, N., Andersson, J., Bång, J.,  
704 Hedenström, E., Löfstedt, C., & Brakefield, P. M. (2008). The male sex pheromone of the  
705 butterfly *Bicyclus anynana*: Towards an evolutionary analysis. *PLoS ONE*, *3*, 1–12.
- 706 Nieberding, C. M., Fischer, K., Saastamoinen, M., Allen, C. E., Wallin, E. A., Hedenström, E., &  
707 Brakefield, P. M. (2012). Cracking the olfactory code of a butterfly: the scent of ageing. *Ecology*  
708 *Letters*, *15*(5), 415–424. <https://doi.org/10.1111/j.1461-0248.2012.01748.x>
- 709 Nieberding, & Holveck, M.-J. (2017). Laboratory social environment biases mating outcome: a first  
710 quantitative synthesis in a butterfly. *Behavioral Ecology and Sociobiology*, *71*, 117.
- 711 Nieberding, & Holveck, M.-J. (2018). Commentary on Kehl et al. “Young male mating success is  
712 associated with sperm number but not with male sex pheromone titres.” *Frontiers in Zoology*,  
713 *15*, 18. <https://doi.org/10.1186/s12983-018-0256-y>

- 714 Nieberding, Van Dyck, H., & Chittka, L. (2018). Adaptive learning in non-social insects: from theory to  
715 field work, and back. *Current Opinion in Insect Science*, 27, 75–81.  
716 <https://doi.org/https://doi.org/10.1016/j.cois.2018.03.008>
- 717 Oostra, V., de Jong, M. A., Invergo, B. M., Kesbeke, F., Wende, F., Brakefield, P. M., & Zwaan, B. J.  
718 (2011). Translating environmental gradients into discontinuous reaction norms via hormone  
719 signalling in a polyphenic butterfly. *Proceedings of the Royal Society B: Biological Sciences*, 278,  
720 789–797. <https://doi.org/10.1098/rspb.2010.1560>
- 721 Oostra, V., Saastamoinen, M., Zwaan, B. J., & Wheat, C. W. (2018). Strong phenotypic plasticity limits  
722 potential for evolutionary responses to climate change. *Nature Communications*, 9(1), 1005.  
723 <https://doi.org/10.1038/s41467-018-03384-9>
- 724 Ozawa, T., & Johansen, J. P. (2018). Learning rules for aversive associative memory formation.  
725 *Current Opinion in Neurobiology*, 49, 148–157.  
726 <https://doi.org/https://doi.org/10.1016/j.conb.2018.02.010>
- 727 Parmesan, C. (2006). *Ecological and evolutionary responses to recent climate change* (Vol. 37, pp.  
728 637–669). Annual Review of Ecology, Evolution, and Systematics.  
729 [http://www.scopus.com/inward/record.url?eid=2-s2.0-](http://www.scopus.com/inward/record.url?eid=2-s2.0-33748994063&partnerID=40&md5=e66b6d52e02cc0be451070024d6b5794)  
730 [33748994063&partnerID=40&md5=e66b6d52e02cc0be451070024d6b5794](http://www.scopus.com/inward/record.url?eid=2-s2.0-33748994063&partnerID=40&md5=e66b6d52e02cc0be451070024d6b5794)
- 731 Parrett, J. M., & Knell, R. J. (2018). The effect of sexual selection on adaptation and extinction under  
732 increasing temperatures. *Proceedings of the Royal Society B: Biological Sciences*, 285(1877).  
733 <https://doi.org/10.1098/rspb.2018.0303>
- 734 Phillips, J., & McIntyre, B. (2000). ENSO and interannual rainfall variability in Uganda: Implications for  
735 agricultural management. *International Journal of Climatology*, 20(2), 171–182.  
736 [https://doi.org/10.1002/\(SICI\)1097-0088\(200002\)20:2<171::AID-JOC471>3.0.CO;2-O](https://doi.org/10.1002/(SICI)1097-0088(200002)20:2<171::AID-JOC471>3.0.CO;2-O)

- 737 Pijpe, J., Brakefield, P. M., & Zwaan, B. J. (2007). Phenotypic plasticity of starvation resistance in the  
738 butterfly *Bicyclus anynana*. *Evolutionary Ecology*, 21, 589–600. <https://doi.org/10.1007/s10682->  
739 006-9137-5
- 740 Pijpe, J., Brakefield, P. M., & Zwaan, B. J. (2008). Increased life span in a polyphenic butterfly  
741 artificially selected for starvation resistance. *American Naturalist*, 171(1), 81–90.  
742 <https://doi.org/10.1086/524200>
- 743 Plesnar-Bielak, A., Skrzynecka, A. M., Prokop, Z. M., & Radwan, J. (2012). Mating system affects  
744 population performance and extinction risk under environmental challenge. *Proceedings of the*  
745 *Royal Society B: Biological Sciences*, 279(1747), 4661–4667.  
746 <https://doi.org/10.1098/rspb.2012.1867>
- 747 Prokuda, A. Y., & Roff, D. A. (2014). The quantitative genetics of sexually selected traits, preferred  
748 traits and preference: a review and analysis of the data. *Journal of Evolutionary Biology*, 27(11),  
749 2283–2296. <https://doi.org/10.1111/jeb.12483>
- 750 Prudic, K. L., Jeon, C., Cao, H., & Monteiro, A. (2011). Developmental plasticity in sexual roles of  
751 butterfly species drives mutual sexual ornamentation. *Science*, 331, 73–75.
- 752 Prudic, K. L., Stoehr, A. M., Wasik, B. R., & Monteiro, A. (2014). Eyespots deflect predator attack  
753 increasing fitness and promoting the evolution of phenotypic plasticity. *Proceedings of the*  
754 *Royal Society B: Biological Sciences*, 282(1798). <https://doi.org/10.1098/rspb.2014.1531>
- 755 Robertson, B. A., Rehage, J. S., & Sih, A. (2013). Ecological novelty and the emergence of evolutionary  
756 traps. *Trends in Ecology & Evolution*, 28(9), 552–560.  
757 <https://doi.org/10.1016/j.tree.2013.04.004>
- 758 Rodrigues, D., Goodner, B. W., & Weiss, M. R. (2010). Reversal learning and risk-averse foraging  
759 behavior in the monarch butterfly, *Danaus plexippus* (Lepidoptera: Nymphalidae). *Ethology*,

- 760           116(3), 270–280. <https://doi.org/10.1111/j.1439-0310.2009.01737.x>
- 761 Roskam, J. C., & Brakefield, P. M. (1999). Seasonal polyphenism in *Bicyclus* (Lepidoptera: Satyridae)  
762 butterflies: different climates need different cues. *Biological Journal of the Linnean Society*,  
763 66(3), 345–356. <https://doi.org/10.1006/bijl.1998.0268>
- 764 San Martin, G., Bacquet, P., & Nieberding, C. M. (2011). Mate choice and sexual selection in a model  
765 butterfly species, *Bicyclus anynana*: State of the art. *Proceedings of Netherlands Entomological*  
766 *Society*, 22, 9–22.
- 767 Santos, M. R., Vieira, N., & Monteiro, N. M. (2018). High temperatures disrupt *Artemia franciscana*  
768 mating patterns and impact sexual selection intensity. *Estuarine, Coastal and Shelf Science*, 207,  
769 209–214. <https://doi.org/10.1016/j.ecss.2018.04.015>
- 770 Schlaepfer, M. A., Runge, M. C., & Sherman, P. W. (2002). Ecological and evolutionary traps. *Trends in*  
771 *Ecology & Evolution*, 17(10), 474–480. [https://doi.org/10.1016/s0169-5347\(02\)02580-6](https://doi.org/10.1016/s0169-5347(02)02580-6)
- 772 Seehausen, O., Van Alphen, J. J. M., & Witte, F. (1997). Cichlid fish diversity threatened by  
773 eutrophication that curbs sexual selection. *Science*, 277(5333), 1808–1811.  
774 <https://doi.org/10.1126/science.277.5333.1808>
- 775 Servedio, M. R., & Boughman, J. W. (2017). The Role of Sexual Selection in Local Adaptation and  
776 Speciation. In *Annual Review of Ecology, Evolution, and Systematics* (Vol. 48, pp. 85–109).  
777 <https://doi.org/10.1146/annurev-ecolsys-110316-022905>
- 778 Shapiro, A. M. (1976). Seasonal polyphenism. *Evolutionary Biology*, 9, 259–333.  
779 [https://doi.org/10.1007/978-1-4615-6950-3\\_6](https://doi.org/10.1007/978-1-4615-6950-3_6)
- 780 Sih, A., Ferrari, M. C. O., & Harris, D. J. (2011). Evolution and behavioural responses to human-  
781 induced rapid environmental change. *Evolutionary Applications*, 4(2), 367–387.  
782 <https://doi.org/10.1111/j.1752-4571.2010.00166.x>

- 783 Sih, A., Trimmer, P. C., & Ehlman, S. M. (2016). A conceptual framework for understanding behavioral  
784 responses to HIREC. *Current Opinion in Behavioral Sciences*, *12*, 109–114.  
785 <https://doi.org/10.1016/j.cobeha.2016.09.014>
- 786 Simpson, S. J., Sword, G. A., & Lo, N. (2011). Polyphenism in insects. *Current Biology*, *21*(18), R738–  
787 R749. <https://doi.org/10.1016/j.cub.2011.06.006>
- 788 Snell-Rood, E. C., Kobiela, M. E., Sikkink, K. L., & Shephard, A. M. (2018). Mechanisms of plastic rescue  
789 in novel environments. In *Annual Review of Ecology, Evolution, and Systematics* (Vol. 49, pp.  
790 331–354). <https://doi.org/10.1146/annurev-ecolsys-110617-062622>
- 791 Sunday, J. M., Bates, A. E., & Dulvy, N. K. (2011). Global analysis of thermal tolerance and latitude in  
792 ectotherms. *Proceedings of the Royal Society B: Biological Sciences*, *278*(1713), 1823–1830.  
793 <https://doi.org/10.1098/rspb.2010.1295>
- 794 Tanaka, Y. (1996). Sexual selection enhances population extinction in a changing environment.  
795 *Journal of Theoretical Biology*, *180*(3), 197–206. <https://doi.org/10.1006/jtbi.1996.0096>
- 796 Taylor, K. E., Stouffer, R. J., & Meehl, G. A. (2012). An overview of CMIP5 and the experiment design.  
797 *Bulletin of the American Meteorological Society*, *93*(4), 485–498. [https://doi.org/10.1175/bams-](https://doi.org/10.1175/bams-d-11-00094.1)  
798 [d-11-00094.1](https://doi.org/10.1175/bams-d-11-00094.1)
- 799 Tedjakumala, S. R., & Giurfa, M. (2013). Rules and mechanisms of punishment learning in honey  
800 bees: the aversive conditioning of the sting extension response. *The Journal of Experimental*  
801 *Biology*, *216*(16), 2985. <https://doi.org/10.1242/jeb.086629>
- 802 Thackeray, S. J., Henrys, P. A., Hemming, D., Bell, J. R., Botham, M. S., Burthe, S., Helaouet, P., Johns,  
803 D. G., Jones, I. D., Leech, D. I., Mackay, E. B., Massimino, D., Atkinson, S., Bacon, P. J., Brereton,  
804 T. M., Carvalho, L., Clutton-Brock, T. H., Duck, C., Edwards, M., ... Wanless, S. (2016).  
805 Phenological sensitivity to climate across taxa and trophic levels. *Nature*, *535*, 241.



- 806 <https://doi.org/10.1038/nature18608>
- 807 Thorpe, W. H. (1963). *Learning and Instinct in Animals*. Methuen and Co. Ltd.
- 808 Twiss, S. D., Thomas, C., Poland, V., Graves, J. A., & Pomeroy, P. (2007). The impact of climatic  
809 variation on the opportunity for sexual selection. *Biology Letters*, 3(1), 12–15.  
810 <https://doi.org/10.1098/rsbl.2006.0559>
- 811 Urban, M. C. (2015). Accelerating extinction risk from climate change. *Science*, 348(6234), 571.  
812 <https://doi.org/10.1126/science.aaa4984>
- 813 Van't Hof, A. E., Zwaan, B. J., Saccheri, I. J., Daly, D., Bot, A. N. M., & Brakefield, P. M. (2005).  
814 Characterization of 28 microsatellite loci for the butterfly *Bicyclus anynana*. *Molecular Ecology*  
815 *Notes*, 5(1), 169–172. <https://doi.org/10.1111/j.1471-8286.2005.00870.x>
- 816 Verzijden, M. N., ten Cate, C., Servedio, M. R., Kozak, G. M., Boughman, J. W., & Svensson, E. (2012).  
817 The impact of learning on sexual selection and speciation. *Trends in Ecology & Evolution*, 27(9),  
818 511–519. <https://doi.org/doi:10.1016/j.tree.2012.05.007>
- 819 Wedell, N. (2010). Variation in male courtship costs in butterflies. *Behavioral Ecology and*  
820 *Sociobiology*, 64(9), 1385–1391. <https://doi.org/10.1007/s00265-010-0953-9>
- 821 West-Eberhard, M. J. (2005). Phenotypic accommodation: Adaptive innovation due to developmental  
822 plasticity. *Journal of Experimental Zoology Part B-Molecular and Developmental Evolution*,  
823 304B(6), 610–618. <https://doi.org/doi:10.1002/jez.b.21071>
- 824 West-Eberhard, M. J. (2014). Darwin's forgotten idea: The social essence of sexual selection.  
825 *Neuroscience and Biobehavioral Reviews*, 46(P4), 501–508.  
826 <https://doi.org/10.1016/j.neubiorev.2014.06.015>
- 827 Westerman, E. L., Hodgins-Davis, A., Dinwiddie, A., & Monteiro, A. (2012). Biased learning affects  
828 mate choice in a butterfly. *Proceedings of the National Academy of Sciences*, 109, 10948–10953.

829 Wijngaarden, P. J., Koch, P. B., & Brakefield, P. M. (2002). Artificial selection on the shape of reaction  
830 norms for eyespot size in the butterfly *Bicyclus anynana*: direct and correlated responses.  
831 *Journal of Evolutionary Biology*, 15(2), 290–300. [https://doi.org/10.1046/j.1420-](https://doi.org/10.1046/j.1420-9101.2002.00380.x)  
832 9101.2002.00380.x

833 Windig, J. J., Brakefield, P. M., Reitsma, N., & Wilson, J. G. M. (1994). Seasonal polyphenism in the  
834 wild: survey of wing patterns in five species of *Bicyclus* butterflies in Malawi. *Ecological*  
835 *Entomology*, 19(3), 285–298. [http://www.scopus.com/inward/record.url?eid=2-s2.0-](http://www.scopus.com/inward/record.url?eid=2-s2.0-0028160077&partnerID=40&md5=7028c76f2c805db1f2adbbbf2ca76154)  
836 0028160077&partnerID=40&md5=7028c76f2c805db1f2adbbbf2ca76154

837 World-Bank-Group. (2019). *Climate Change Knowledge Portal*.  
838 <https://climateknowledgeportal.worldbank.org/country/malawi/climate-data-historical>

839

840

841 **Supplementary Figures**

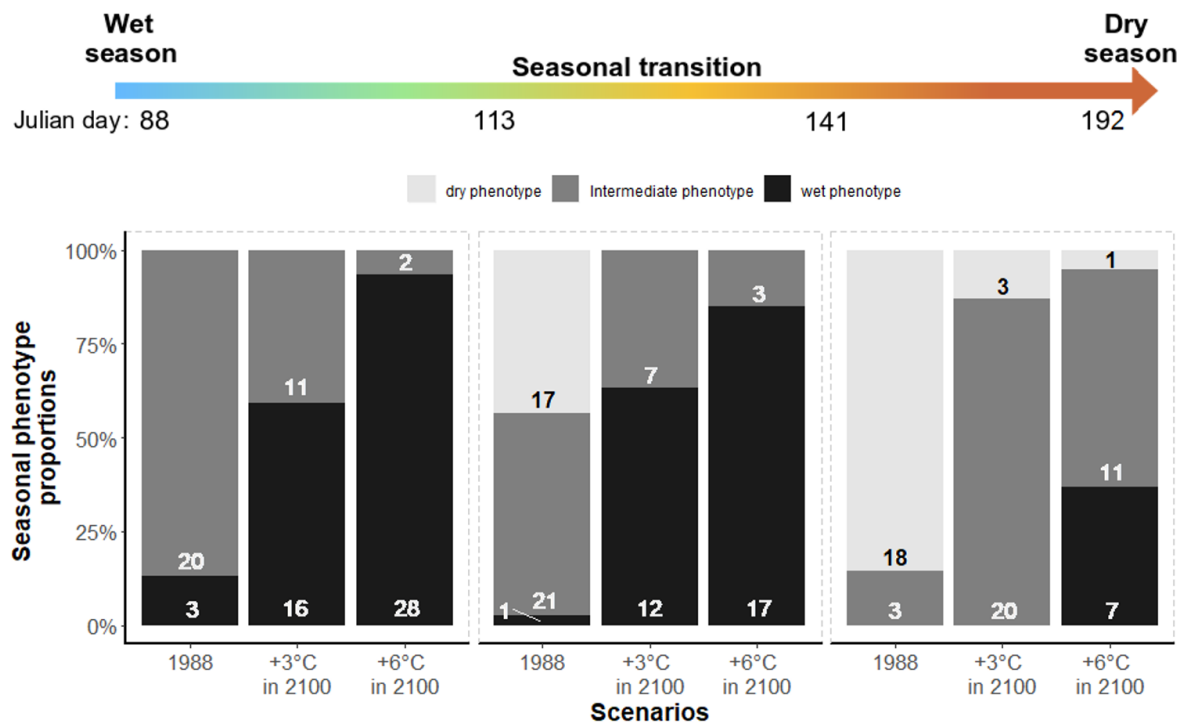

842

843 **Fig. S1.** Proportions of male seasonal forms (dry, intermediate, wet) under the three different  
844 climatic scenarios for cohort 1, 2 and 3 (each in 1 graph) for the entire duration of the seasonal  
845 transition from the wet to the dry season.

846

847

848

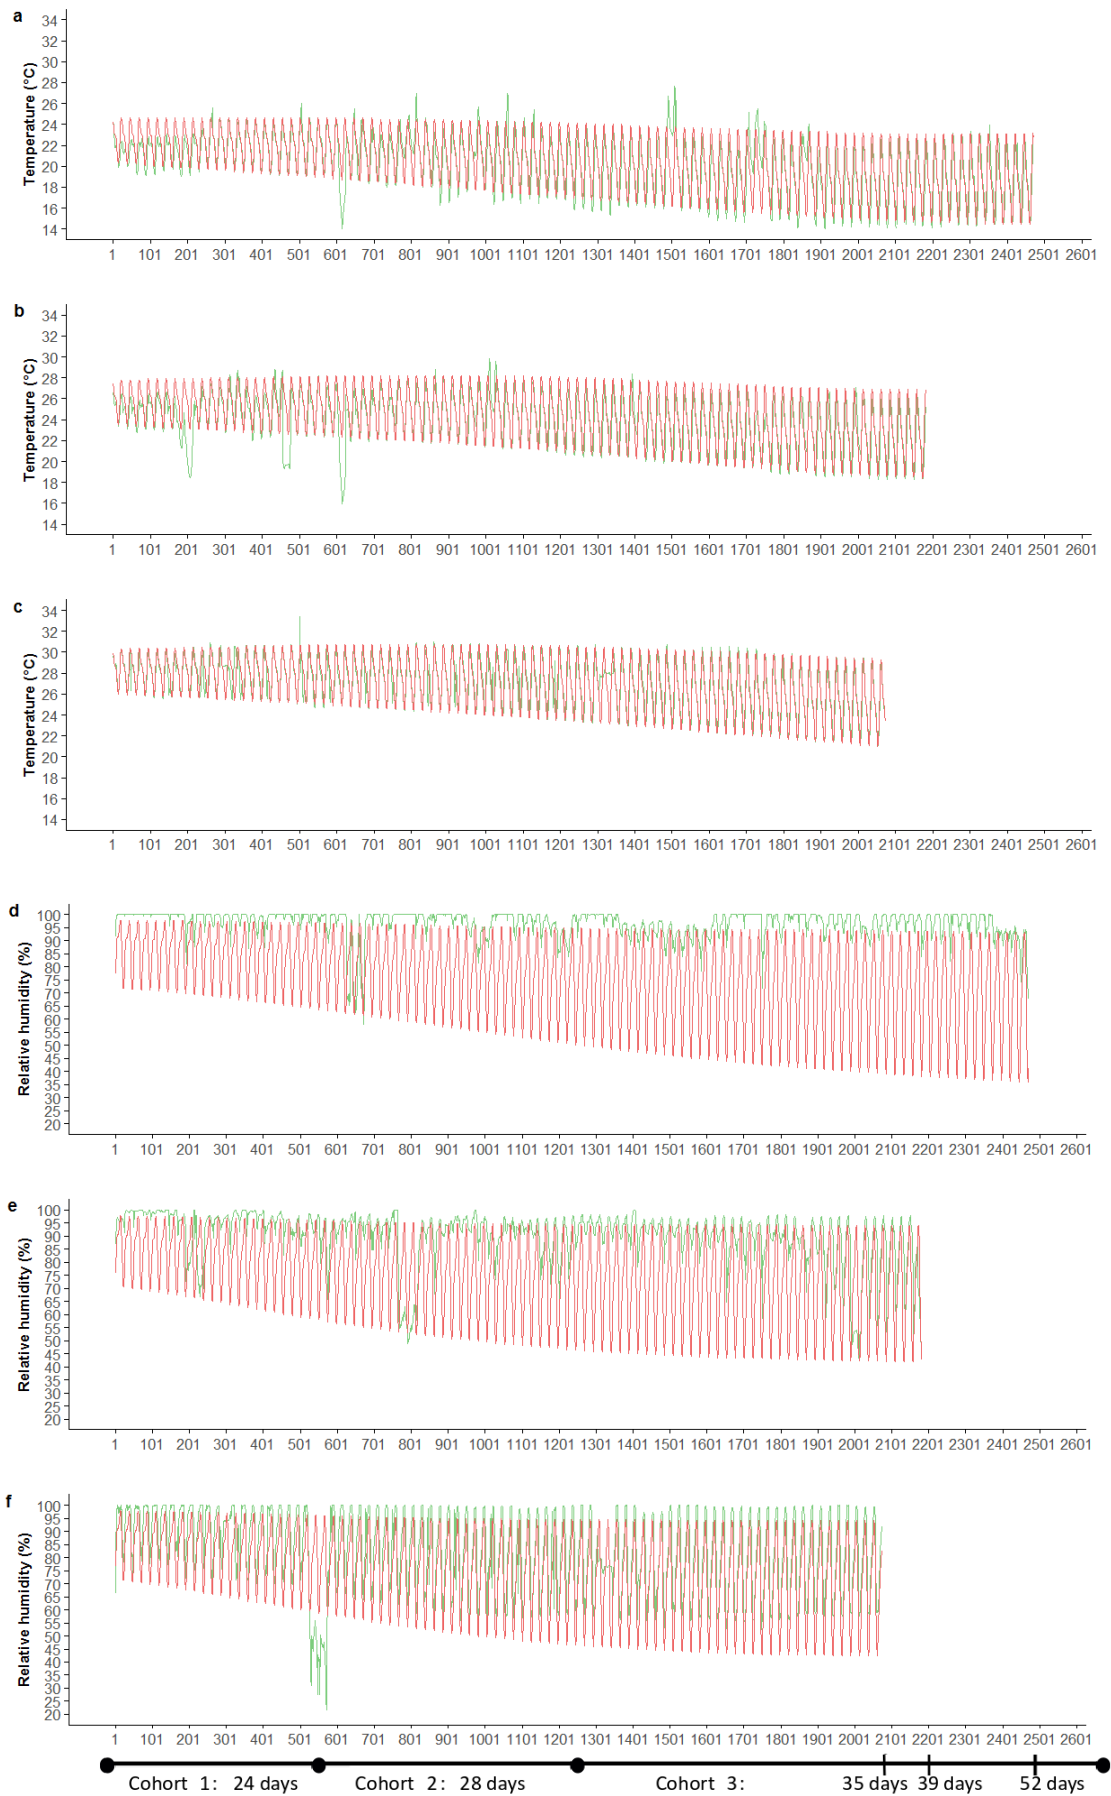

849 **Fig. S2.** Experimental and theoretical temperature and relative humidity throughout the  
850 seasonal transition. We registered the experimental temperature ( $^{\circ}\text{C}$ ; a-c) and relative humidity  
851 ( $\%$ ; d-f) with sensors (HOBO U23-001) in the incubators (green) and compared them to  
852 theoretical climatic conditions (red) per hour throughout the whole transition from the wet to  
853 the dry season, which started at the 88<sup>th</sup> day of the year. We modelled three climatic scenarios:  
854 the past reference climate from 1988 (a and d), the predicted RCP4.5 climate of  $+3^{\circ}\text{C}$  on average  
855 in 2100 (b and e) and the predicted RCP8.5 climate of  $+6^{\circ}\text{C}$  on average in 2100 in Malawi (c  
856 and f).  
857

858 **Table S1.** Model-averaged standardized coefficients following conditional average of the set of  
 859 supported candidate models for each response variable. For each conditional average of  
 860 supported candidate models ( $\Delta_i < 2$ ), we provide the relative importance of explanatory  
 861 variables ( $P \leq 0.05$  in bold). Of note, sexes differ in their developmental response to climate  
 862 warming (Fig. 2b): males emerged earlier than females; female developmental time compared  
 863 decreased faster with warming (scenario-by-sex interaction) and increased faster throughout the  
 864 seasonal transition (cohort-by-sex interaction) compared to males. These sex differences  
 865 become smallest under the warmer scenario and at the beginning of the seasonal transition.

| Response                                                                   | Explanatory                                                | Estimate | SE    | Adjusted SE | z value | P value           | w <sub>+</sub> |
|----------------------------------------------------------------------------|------------------------------------------------------------|----------|-------|-------------|---------|-------------------|----------------|
| Survival until<br>adult emergence <sup>a</sup>                             | Intercept                                                  | 0        | 0     | 0           | NA      | NA                | 0.70           |
|                                                                            | <b>Scenario</b>                                            | 0.026    | 0.012 | 0.012       | 2.2     | <b>0.03</b>       | 0.49           |
| Developmental<br>time <sup>b</sup>                                         | Intercept                                                  | 0        | 0     | 0           | NA      | NA                | 0.94           |
|                                                                            | Cohort                                                     | -0.008   | 0.006 | 0.006       | 1.5     | 0.15              | 0.94           |
|                                                                            | <b>Scenario</b>                                            | -0.046   | 0.005 | 0.005       | 8.4     | <b>&lt; 0.001</b> | 0.94           |
|                                                                            | <b>Sex</b>                                                 | -0.015   | 0.001 | 0.001       | 13.8    | <b>&lt; 0.001</b> | 0.94           |
|                                                                            | <b>Cohort x Scenario</b>                                   | 0.019    | 0.006 | 0.006       | 3.4     | <b>&lt; 0.001</b> | 0.94           |
|                                                                            | <b>Cohort x Sex</b>                                        | 0.004    | 0.002 | 0.002       | 2.7     | <b>0.007</b>      | 0.94           |
|                                                                            | <b>Scenario x Sex</b>                                      | -0.006   | 0.001 | 0.001       | 3.9     | <b>&lt; 0.001</b> | 0.94           |
| Cohort x Scenario x Sex                                                    | 0.002                                                      | 0.001    | 0.001 | 1.6         | 0.11    | 0.54              |                |
| Relative area of<br>adult polyphenic<br>hv5 eyespot<br>pupils <sup>a</sup> | Intercept                                                  | 0        | 0     | 0           | NA      | NA                | 0.61           |
|                                                                            | <b>Cohort</b>                                              | 0.470    | 0.075 | 0.075       | 6.2     | <b>&lt; 0.001</b> | 0.61           |
|                                                                            | <b>Scenario</b>                                            | 0.662    | 0.078 | 0.079       | 8.4     | <b>&lt; 0.001</b> | 0.61           |
|                                                                            | Cohort x Scenario                                          | -0.095   | 0.071 | 0.071       | 1.3     | 0.18              | 0.27           |
| Fertilization<br>success <sup>a</sup>                                      | Intercept                                                  | 0        | 0     | 0           | NA      | NA                | 0.35           |
|                                                                            | Female experience                                          | -0.139   | 0.913 | 0.921       | 0.2     | 0.9               | 0.35           |
|                                                                            | Female age at mating                                       | 1.861    | 0.977 | 0.986       | 1.9     | 0.059             | 0.35           |
|                                                                            | <b>Male mate thermal treatment</b>                         | 2.111    | 0.918 | 0.925       | 2.3     | <b>0.023</b>      | 0.35           |
|                                                                            | <b>Female experience x Male mate<br/>thermal treatment</b> | -2.151   | 0.900 | 0.907       | 2.4     | <b>0.018</b>      | 0.35           |
|                                                                            | Thermal treatment duration                                 | -0.616   | 0.985 | 0.993       | 0.6     | 0.5               | 0.10           |
| Female<br>longevity <sup>a</sup>                                           | Intercept                                                  | 0        | 0     | 0           | NA      | NA                | 0.27           |
|                                                                            | <b>Female experience</b>                                   | -0.025   | 0.006 | 0.006       | 3.9     | <b>&lt; 0.001</b> | 0.27           |

|                                    |        |       |       |     |     |      |
|------------------------------------|--------|-------|-------|-----|-----|------|
| Mate choice allowed                | -0.006 | 0.006 | 0.006 | 1.0 | 0.3 | 0.14 |
| Female feeding status after mating | -0.005 | 0.005 | 0.005 | 0.9 | 0.3 | 0.14 |
| Male mate age at mating            | -0.005 | 0.006 | 0.006 | 0.8 | 0.4 | 0.14 |
| Male mate thermal treatment        | 0.002  | 0.005 | 0.005 | 0.5 | 0.6 | 0.13 |

866  $\Delta_i$  = difference in AIC<sup>b</sup> (or AICc<sup>a</sup>) of model *i* with the best candidate model (i.e., the model  
867 with the smallest AIC<sup>b</sup> or AICc<sup>a</sup>). SE = Conditional standard errors; Adjusted SE = Adjusted  
868 standard error estimator with improved coverage.  $w_+$  = sum of the normalized Akaike weights  
869 across all candidate models ( $\Delta_i < 2$ ) in which the variable occurred. NA = not applicable.

870

871 **Table S2.** Analyses of male mating proportions adjusted by courtship activity as a function of male seasonal phenotype in the experiments with  
872 naive or experienced wet season females. Using Chi-squared tests for given probabilities, we first tested for differences in mating probabilities  
873 among males of different seasonal phenotypes; second, we searched for the male phenotype(s) responsible for these differences by comparing the  
874 observed and theoretical mating proportions for each of the three male phenotypes and in paired comparisons between male phenotypes, by  
875 computing *P*-values with and without (in brackets) Holm-Bonferroni correction for multiple comparisons.  $P \leq 0.05$  are in bold.

| Tests                                                                                          | Comparisons                        | Naive females<br>(20 replicates; Fig. 3a)  |     |             | Females exposed to wet males<br>(20 replicates; Fig. 3b) |      |          | Females exposed to intermediate males<br>(17 replicates; Fig. 3c) |      |                              | Females exposed to dry males<br>(15 replicates; Fig. 3d) |     |          |                       |
|------------------------------------------------------------------------------------------------|------------------------------------|--------------------------------------------|-----|-------------|----------------------------------------------------------|------|----------|-------------------------------------------------------------------|------|------------------------------|----------------------------------------------------------|-----|----------|-----------------------|
|                                                                                                |                                    | Chi <sup>2</sup>                           | df  | <i>P</i>    | Chi <sup>2</sup>                                         | df   | <i>P</i> | Chi <sup>2</sup>                                                  | df   | <i>P</i>                     | Chi <sup>2</sup>                                         | df  | <i>P</i> |                       |
| Comparison of mating probabilities<br>between male phenotypes                                  | wet vs. intermediate vs. dry males | 7.8                                        | 2   | <b>0.02</b> | 0.5                                                      | 2    | 0.8      | 80                                                                | 2    | <b>&lt;0.001<sup>a</sup></b> | 4.6                                                      | 2   | 0.098    |                       |
| Searching for the<br>phenotype(s)<br>responsible for<br>differences in<br>mating probabilities | Per male<br>phenotype              | wet males (vs. intermediate and dry males) | 0.2 | 1           | 0.6 (0.6)                                                | 0.5  | 1        | 1.0 (0.5)                                                         | 9.2  | 1                            | <b>0.005 (0.002)</b>                                     | 4.4 | 1        | 0.11 ( <b>0.036</b> ) |
|                                                                                                |                                    | intermediate males (vs. wet and dry males) | 2.9 | 1           | 0.2 (0.088)                                              | 0.1  | 1        | 1.0 (0.7)                                                         | 78.8 | 1                            | <b>&lt;0.001 (&lt;0.001)<sup>b</sup></b>                 | 0.6 | 1        | 0.5 (0.5)             |
|                                                                                                |                                    | dry males (vs. wet and intermediate males) | 7.5 | 1           | <b>0.019 (0.006)</b>                                     | 0.1  | 1        | 1.0 (0.7)                                                         | 0.6  | 1                            | 0.4 (0.4)                                                | 2.1 | 1        | 0.3 (0.15)            |
|                                                                                                | In paired<br>comparisons           | wet vs. intermediate males                 | 0.4 | 1           | 0.5 (0.5)                                                | 0.4  | 1        | 1.0 (0.5)                                                         | 73   | 1                            | <b>&lt;0.001 (&lt;0.001)<sup>c</sup></b>                 | 2.9 | 1        | 0.2 (0.09)            |
|                                                                                                |                                    | wet vs. dry males                          | 4.1 | 1           | 0.084 ( <b>0.042</b> )                                   | 0.4  | 1        | 1.0 (0.5)                                                         | 1.8  | 1                            | 0.2 (0.2)                                                | 4.4 | 1        | 0.11 ( <b>0.037</b> ) |
|                                                                                                |                                    | intermediate vs. dry males                 | 7.3 | 1           | <b>0.021 (0.007)</b>                                     | 0.01 | 1        | 0.9 (0.9)                                                         | 52   | 1                            | <b>&lt;0.001 (&lt;0.001)<sup>d</sup></b>                 | 0.2 | 1        | 0.7 (0.7)             |

876 Wet, wet season males (27°C). Intermediate, intermediate season males (23°C). Dry, dry season males (17°C). When expected frequencies were  
877 below 5, we also report the *P*-value of Fisher's exact test: <sup>a</sup> $P = 0.042$ , <sup>b</sup> $P < 0.001$  (<0.001), <sup>c</sup> $P = 0.014$  (0.007), <sup>d</sup> $P = 0.008$  (0.003).
